# Supplementary material
Source: PubMed Central journal article supplement (PMC2747939)
Supplement: supp_77_10_4243__1.pdf [file supp_77_10_4243__1.pdf]

Table S1. p200 Target Genes Identified by ChIP-chip (FDR 0.01).

| CHR | FDR      | Name         | Accession    | Description                                                                              |
|-----|----------|--------------|--------------|------------------------------------------------------------------------------------------|
| 1   | 0.00E+00 | MGC12760     | XM_934986    | hypothetical protein MGC12760                                                            |
| 1   | 0.00E+00 | LOC51152     | AF172850     | melanoma antigen                                                                         |
| 1   | 0.00E+00 | LOC644530    | XM_927658    | hypothetical protein LOC644530                                                           |
| 1   | 0.00E+00 | DUSP10       | NM_144728    | dual specificity phosphatase 10                                                          |
| 1   | 0.00E+00 | ARTN         | NM_057091    | artemin                                                                                  |
| 1   | 0.00E+00 | ERMAP        | NM_001017922 | erythroblast membrane-associated protein (Scianna blood group)                           |
| 1   | 0.00E+00 | CCDC23       | NM_199342    | coiled-coil domain containing 23                                                         |
| 1   | 0.00E+00 | ENAH         | AK126894     | enabled homolog (Drosophila)                                                             |
| 1   | 0.00E+00 | SLC2A1       | NM_006516    | solute carrier family 2 (facilitated glucose transporter), member 1                      |
| 1   | 0.00E+00 | YIPF1        | NM_018982    | Yip1 domain family, member 1                                                             |
| 1   | 0.00E+00 | DIO1         | NM_000792    | deiodinase, iodothyronine, type I                                                        |
| 1   | 0.00E+00 | NDUFS2       | NM_004550    | NADH dehydrogenase (ubiquinone) Fe-S protein 2, 49kDa (NADH-coenzyme Q reductase)        |
| 1   | 0.00E+00 | ADAMTS4      | NM_005099    | ADAM metalloproteinase with thrombospondin type 1 motif, 4                               |
| 1   | 0.00E+00 | BTG2         | NM_006763    | BTG family, member 2                                                                     |
| 1   | 0.00E+00 | EDN2         | BC034393     | endothelin 2                                                                             |
| 1   | 0.00E+00 | MGC52000     | BC106020     | CXYorf1-related protein                                                                  |
| 1   | 0.00E+00 | FLJ25222     | BC063682     | CXYorf1-related protein                                                                  |
| 1   | 0.00E+00 | LOC647135    | XM_930578    | similar to SLIT-ROBO Rho GTPase-activating protein 2 (srGAP2) (Formin-binding protein 2) |
| 1   | 0.00E+00 | LOC644605    | XM_927717    | hypothetical protein LOC644605                                                           |
| 1   | 0.00E+00 | KIAA0467     | BC052802     | KIAA0467                                                                                 |
| 1   | 0.00E+00 | C1orf34      | XM_934654    | chromosome 1 open reading frame 34                                                       |
| 1   | 0.00E+00 | PPIE         | DQ160195     | peptidylprolyl isomerase E (cyclophilin E)                                               |
| 1   | 0.00E+00 | C1orf176     | BC021969     | chromosome 1 open reading frame 176                                                      |
| 1   | 0.00E+00 | FDPS         | NM_002004    | farnesyl diphosphate synthase                                                            |
| 1   | 0.00E+00 | PIK3C2B      | NM_002646    | phosphoinositide-3-kinase, class 2, beta polypeptide                                     |
| 1   | 0.00E+00 | KCNQ4        | NM_004700    | potassium voltage-gated channel, KQT-like subfamily, member 4                            |
| 1   | 0.00E+00 | RCSD1        | BC013186     | RCSD domain containing 1                                                                 |
| 1   | 0.00E+00 | GUCA2A       | NM_033553    | guanylate cyclase activator 2A (guanylin)                                                |
| 1   | 0.00E+00 | MFSD2        | NM_032793    | major facilitator superfamily domain containing 2                                        |
| 1   | 0.00E+00 | EPS8L3       | NM_133181    | EPS8-like 3                                                                              |
| 1   | 0.00E+00 | IGSF4B       | BC033819     | immunoglobulin superfamily, member 4B                                                    |
| 1   | 0.00E+00 | USP1         | NM_001017415 | ubiquitin specific peptidase 1                                                           |
| 1   | 0.00E+00 | RIMS3        | NM_014747    | regulating synaptic membrane exocytosis 3                                                |
| 1   | 0.00E+00 | ZNF691       | NM_015911    | zinc finger protein 691                                                                  |
| 1   | 0.00E+00 | USF1         | NM_007122    | upstream transcription factor 1                                                          |
| 1   | 0.00E+00 | C1orf145     | NM_001025495 | chromosome 1 open reading frame 145                                                      |
| 1   | 9.40E-04 | CDC42SE1     | BC012796     | CDC42 small effector 1                                                                   |
| 1   | 9.40E-04 | MLLT11       | BC022448     | myeloid/lymphoid or mixed-lineage leukemia                                               |
| 1   | 9.40E-04 | ZMYND12      | BC024186     | zinc finger, MYND-type containing 12                                                     |
| 1   | 9.40E-04 | PPCS         | BC112015     | phosphopantothienylcysteine synthetase                                                   |
| 1   | 1.07E-03 | SLC16A1      | BC026317     | solute carrier family 16 (monocarboxylic acid transporters), member 1                    |
| 1   | 1.07E-03 | MED8         | BC010543     | mediator of RNA polymerase II transcription, subunit 8 homolog (S. cerevisiae)           |
| 1   | 1.07E-03 | C1orf84      | NM_182518    | chromosome 1 open reading frame 84                                                       |
| 1   | 1.44E-03 | GBA          | BC000349     | glucosidase, beta%3B acid (includes glucosylceramidase)                                  |
| 1   | 1.44E-03 | PRCC         | NM_199416    | papillary renal cell carcinoma (translocation-associated)                                |
| 1   | 1.44E-03 | LOC149134    | NM_207326    | hypothetical protein LOC149134                                                           |
| 1   | 1.44E-03 | SH3BP5L      | NM_030645    | SH3-binding domain protein 5-like                                                        |
| 1   | 1.44E-03 | RLF          | NM_012421    | rearranged L-myc fusion                                                                  |
| 1   | 1.81E-03 | RP11-312O7.1 | XM_934223    | novel protein                                                                            |

|   |          |              |              |                                                                                          |
|---|----------|--------------|--------------|------------------------------------------------------------------------------------------|
| 1 | 1.81E-03 | FAM72A       | AB096683     | family with sequence similarity 72, member A                                             |
| 1 | 1.81E-03 | OR2T2        | NM_001004136 | olfactory receptor, family 2, subfamily T, member 2                                      |
| 1 | 1.95E-03 | MAPKAPK2     | NM_032960    | mitogen-activated protein kinase-activated protein kinase 2                              |
| 1 | 1.95E-03 | KIF26B       | AK001019     | kinesin family member 26B                                                                |
| 1 | 1.95E-03 | OXCT2        | NM_022120    | 3-oxoacid CoA transferase 2                                                              |
| 1 | 2.29E-03 | CAP1         | BC095440     | CAP, adenylate cyclase-associated protein 1 (yeast)                                      |
| 1 | 2.92E-03 | C1orf104     | NM_001039517 | chromosome 1 open reading frame 104                                                      |
| 1 | 3.10E-03 | PTPRU        | NM_005704    | protein tyrosine phosphatase, receptor type, U                                           |
| 1 | 3.51E-03 | C1orf106     | AK001583     | chromosome 1 open reading frame 106                                                      |
| 1 | 4.05E-03 | DUSP5P       | AK092260     | dual specificity phosphatase 5 pseudogene                                                |
| 1 | 4.05E-03 | RP4-621O15.2 | AK055963     | hypothetical protein FLJ31401                                                            |
| 1 | 4.05E-03 | LOC645014    | XM_928076    | similar to hypothetical protein FLJ31401                                                 |
| 1 | 4.39E-03 | PPFIA4       | NM_015053    | protein tyrosine phosphatase, receptor type, f polypeptide, interacting protein, alpha 4 |
| 1 | 4.39E-03 | ADORA1       | BC026340     | adenosine A1 receptor                                                                    |
| 1 | 4.39E-03 | PCNXL2       | NM_024938    | pecanex-like 2 (Drosophila)                                                              |
| 1 | 4.78E-03 | ZNF496       | NM_032752    | zinc finger protein 496                                                                  |
| 1 | 5.11E-03 | ANKRD35      | BC101618     | ankyrin repeat domain 35                                                                 |
| 1 | 5.11E-03 | RAG1AP1      | BC009621     | recombination activating gene 1 activating protein 1                                     |
| 1 | 5.11E-03 | EXOC8        | BC035763     | exocyst complex component 8                                                              |
| 1 | 5.11E-03 | C1orf124     | NM_032018    | chromosome 1 open reading frame 124                                                      |
| 1 | 5.11E-03 | ZMPSTE24     | BC037283     | zinc metalloproteinase (STE24 homolog, yeast)                                            |
| 1 | 5.11E-03 | YBX1         | BC070084     | Y box binding protein 1                                                                  |
| 1 | 6.37E-03 | LOC644539    | XM_927663    | similar to sorting nexin associated golgi protein 1                                      |
| 1 | 6.37E-03 | NOTCH2NL     | NM_203458    | Notch homolog 2 (Drosophila) N-terminal like                                             |
| 1 | 6.37E-03 | MARCKSL1     | BC066915     | MARCKS-like 1                                                                            |
| 1 | 6.37E-03 | SMAP1L       | BC021133     | stromal membrane-associated protein 1-like                                               |
| 1 | 6.38E-03 | KIAA0859     | BC029083     | KIAA0859                                                                                 |
| 1 | 6.80E-03 | GPR61        | BC067464     | G protein-coupled receptor 61                                                            |
| 1 | 6.80E-03 | GNAI3        | BC025285     | guanine nucleotide binding protein (G protein), alpha inhibiting activity polypeptide 3  |
| 1 | 6.80E-03 | POLR3GL      | NM_032305    | polymerase (RNA) III (DNA directed) polypeptide G (32kD) like                            |
| 1 | 6.80E-03 | LAMB3        | NM_000228    | laminin, beta 3                                                                          |
| 1 | 6.90E-03 | WDR3         | NM_006784    | WD repeat domain 3                                                                       |
| 1 | 6.90E-03 | GDAP2        | NM_017686    | ganglioside induced differentiation associated protein 2                                 |
| 1 | 7.02E-03 | NBPF10       | NM_001039703 | neuroblastoma breakpoint family, member 10                                               |
| 1 | 7.02E-03 | NBPF1        | XM_934957    | neuroblastoma breakpoint family, member 1                                                |
| 1 | 7.89E-03 | AMY1A        | NM_001008221 | amylase, alpha 1A%3B salivary                                                            |
| 1 | 7.89E-03 | NBPF15       | AY894566     | neuroblastoma breakpoint family, member 15                                               |
| 1 | 7.89E-03 | NBPF8        | AY894562     | neuroblastoma breakpoint family, member 8                                                |
| 1 | 7.89E-03 | LOC644291    | XM_934083    | similar to CG10522-PA                                                                    |
| 1 | 7.89E-03 | LOC645126    | XM_928158    | similar to profilin 1                                                                    |
| 1 | 7.89E-03 | TMEM58       | BC111855     | transmembrane protein 58                                                                 |
| 1 | 8.10E-03 | C1orf41      | NM_016126    | chromosome 1 open reading frame 41                                                       |
| 1 | 8.10E-03 | LRRC42       | NM_052940    | leucine rich repeat containing 42                                                        |
| 1 | 8.20E-03 | NPR1         | BC063304     | natriuretic peptide receptor A/guanylate cyclase A (atrionatriuretic peptide receptor A) |
| 1 | 8.27E-03 | NIT1         | BC046149     | nitrilase 1                                                                              |
| 1 | 8.27E-03 | PFDN2        | NM_012394    | prefoldin subunit 2                                                                      |
| 1 | 8.27E-03 | FCER1G       | NM_004106    | Fc fragment of IgE, high affinity I, receptor for%3B gamma polypeptide                   |
| 1 | 8.27E-03 | CEP350       | NM_014810    | centrosomal protein 350kDa                                                               |
| 1 | 8.27E-03 | NFYC         | AK000346     | nuclear transcription factor Y, gamma                                                    |
| 1 | 9.29E-03 | MAGI3        | NM_020965    | membrane associated guanylate kinase, WW and PDZ domain containing 3                     |
| 1 | 9.29E-03 | RNASEL       | CR627369     | ribonuclease L (2',5'-oligoadenylate synthetase-dependent)                               |
| 1 | 9.45E-03 | PDE4DIP      | AB007923     | phosphodiesterase 4D interacting protein (myomegalin)                                    |

|   |          |              |              |                                                                                   |
|---|----------|--------------|--------------|-----------------------------------------------------------------------------------|
| 1 | 9.45E-03 | IER5         | NM_016545    | immediate early response 5                                                        |
| 1 | 9.70E-03 | C1orf2       | AL353941     | chromosome 1 open reading frame 2                                                 |
| 1 | 9.70E-03 | CD48         | BC030224     | CD48 molecule                                                                     |
| 2 | 0.00E+00 | C2orf30      | BC022228     | chromosome 2 open reading frame 30                                                |
| 2 | 0.00E+00 | ASB3         | NM_016115    | ankyrin repeat and SOCS box-containing 3                                          |
| 2 | 0.00E+00 | SLC4A5       | BC109221     | solute carrier family 4, sodium bicarbonate cotransporter, member 5               |
| 2 | 0.00E+00 | ZNF513       | BC052282     | zinc finger protein 513                                                           |
| 2 | 0.00E+00 | LOC349338    | NM_182905    | CXYorf1-related protein                                                           |
| 2 | 0.00E+00 | C2orf14      | AL136789     | chromosome 2 open reading frame 14                                                |
| 2 | 0.00E+00 | LOC440905    | NM_001013711 | hypothetical protein LOC440905                                                    |
| 2 | 0.00E+00 | MGC13005     | BC005070     | hypothetical protein MGC13005                                                     |
| 2 | 0.00E+00 | LOC643905    | XM_927170    | similar to protocadherin 15b                                                      |
| 2 | 0.00E+00 | TGOLN2       | BC028219     | trans-golgi network protein 2                                                     |
| 2 | 0.00E+00 | LOC442028    | BC042429     | hypothetical LOC442028                                                            |
| 2 | 9.40E-04 | ABCB6        | BC043423     | ATP-binding cassette, sub-family B (MDR/TAP), member 6                            |
| 2 | 9.40E-04 | CYP26B1      | BC069443     | cytochrome P450, family 26, subfamily B, polypeptide 1                            |
| 2 | 9.40E-04 | LBX2         | NM_001009812 | ladybird homeobox homolog 2 (Drosophila)                                          |
| 2 | 1.07E-03 | ABHD1        | NM_152870    | abhydrolase domain containing 1                                                   |
| 2 | 1.07E-03 | CGREF1       | NM_006569    | cell growth regulator with EF-hand domain 1                                       |
| 2 | 1.44E-03 | RABL2A       | CR456554     | RAB, member of RAS oncogene family-like 2A                                        |
| 2 | 1.44E-03 | TMEM37       | BC046362     | transmembrane protein 37                                                          |
| 2 | 1.44E-03 | DQX1         | NM_133637    | DEAQ box polypeptide 1 (RNA-dependent ATPase)                                     |
| 2 | 1.44E-03 | HTRA2        | NM_145074    | HtrA serine peptidase 2                                                           |
| 2 | 1.81E-03 | RP11-34P13.4 | AF346307     | F379 retina-specific protein                                                      |
| 2 | 2.29E-03 | LOC51255     | NM_016494    | hypothetical protein LOC51255                                                     |
| 2 | 2.92E-03 | FLJ38379     | AK095698     | hypothetical protein FLJ38379                                                     |
| 2 | 3.25E-03 | STAT1        | NM_007315    | signal transducer and activator of transcription 1, 91kDa                         |
| 2 | 4.05E-03 | MGC42174     | AK094293     | hypothetical protein MGC42174                                                     |
| 2 | 6.37E-03 | AFF3         | NM_002285    | AF4/FMR2 family, member 3                                                         |
| 2 | 6.80E-03 | ASNSD1       | BC001243     | asparagine synthetase domain containing 1                                         |
| 2 | 6.80E-03 | PNPT1        | NM_033109    | polyribonucleotide nucleotidyltransferase 1                                       |
| 2 | 6.90E-03 | LIMS3        | NM_033514    | LIM and senescent cell antigen-like domains 3                                     |
| 2 | 7.89E-03 | EIF2B4       | NM_172195    | eukaryotic translation initiation factor 2B, subunit 4 delta, 67kDa               |
| 2 | 7.89E-03 | SNX17        | NM_014748    | sorting nexin 17                                                                  |
| 2 | 8.20E-03 | ASCC3L1      | NM_014014    | activating signal cointegrator 1 complex subunit 3-like 1                         |
| 2 | 8.27E-03 | ANKZF1       | NM_018089    | ankyrin repeat and zinc finger domain containing 1                                |
| 2 | 8.77E-03 | PREI3        | NM_199482    | preimplantation protein 3                                                         |
| 3 | 0.00E+00 | C3orf32      | BC052614     | chromosome 3 open reading frame 32                                                |
| 3 | 0.00E+00 | STT3B        | AK074587     | STT3, subunit of the oligosaccharyltransferase complex, homolog B (S. cerevisiae) |
| 3 | 0.00E+00 | ZFYVE20      | NM_022340    | zinc finger, FYVE domain containing 20                                            |
| 3 | 0.00E+00 | TCTA         | BC005157     | T-cell leukemia translocation altered gene                                        |
| 3 | 0.00E+00 | RHOA         | NM_001664    | ras homolog gene family, member A                                                 |
| 3 | 0.00E+00 | MCM2         | NM_004526    | MCM2 minichromosome maintenance deficient 2, mitotin (S. cerevisiae)              |
| 3 | 0.00E+00 | UCN2         | BC022096     | urocortin 2                                                                       |
| 3 | 9.40E-04 | C3orf29      | NM_022485    | chromosome 3 open reading frame 29                                                |
| 3 | 3.25E-03 | EIF4G1       | AF104913     | eukaryotic translation initiation factor 4 gamma, 1                               |
| 3 | 3.25E-03 | MUC4         | NM_018406    | mucin 4, cell surface associated                                                  |
| 3 | 3.25E-03 | BRPF1        | NM_004634    | bromodomain and PHD finger containing, 1                                          |
| 3 | 5.11E-03 | XPC          | BC016620     | xeroderma pigmentosum, complementation group C                                    |
| 3 | 5.11E-03 | LSM3         | BC007055     | LSM3 homolog, U6 small nuclear RNA associated (S. cerevisiae)                     |
| 3 | 6.37E-03 | LMLN         | AJ312398     | leishmanolysin-like (metallopeptidase M8 family)                                  |
| 3 | 6.37E-03 | IQCG         | NM_032263    | IQ motif containing G                                                             |

|   |          |                |              |                                                                                        |
|---|----------|----------------|--------------|----------------------------------------------------------------------------------------|
| 3 | 6.37E-03 | RFT1           | NM_052859    | RFT1 homolog ( <i>S. cerevisiae</i> )                                                  |
| 3 | 6.80E-03 | GTF2E1         | AK223401     | general transcription factor IIE, polypeptide 1, alpha 56kDa                           |
| 3 | 6.80E-03 | RABL3          | NM_173825    | RAB, member of RAS oncogene family-like 3                                              |
| 3 | 6.80E-03 | SEMA3G         | NM_020163    | sema domain, immunoglobulin domain (Ig), short basic domain, secreted, (semaphorin) 3G |
| 3 | 9.29E-03 | TTL3           | BC105638     | tubulin tyrosine ligase-like family, member 3                                          |
| 3 | 9.70E-03 | C3orf54        | NM_203370    | chromosome 3 open reading frame 54                                                     |
| 3 | 9.70E-03 | LOC389118      | NM_001007540 | VLLR9392                                                                               |
| 4 | 0.00E+00 | DUB3           | BC100993     | deubiquitinating enzyme 3                                                              |
| 4 | 0.00E+00 | LOC653460      | XM_377835    | similar to deubiquitinating enzyme 3                                                   |
| 4 | 0.00E+00 | LOC653462      | XM_377836    | similar to deubiquitinating enzyme 3                                                   |
| 4 | 0.00E+00 | CCDC96         | BC105055     | coiled-coil domain containing 96                                                       |
| 4 | 0.00E+00 | LOC653545      | XM_928008    | similar to double homeobox, 4                                                          |
| 4 | 0.00E+00 | LOC441056      | XM_496731    | similar to double homeobox, 4                                                          |
| 4 | 0.00E+00 | DUX4           | NM_033178    | double homeobox, 4                                                                     |
| 4 | 0.00E+00 | LOC653548      | XM_928023    | similar to double homeobox, 4                                                          |
| 4 | 0.00E+00 | MAEA           | AK125501     | macrophage erythroblast attacher                                                       |
| 4 | 0.00E+00 | FGFRL1         | BC036769     | fibroblast growth factor receptor-like 1                                               |
| 4 | 0.00E+00 | DUX4C          | NM_001023569 | double homeobox 4c                                                                     |
| 4 | 9.40E-04 | EREG           | NM_001432    | epiregulin                                                                             |
| 4 | 1.44E-03 | LOC653544      | XM_928003    | similar to double homeobox, 4                                                          |
| 4 | 1.81E-03 | PCDH7          | NM_032456    | BH-protocadherin (brain-heart)                                                         |
| 4 | 1.81E-03 | LOC653454      | XM_377832    | similar to deubiquitinating enzyme 3                                                   |
| 4 | 1.81E-03 | LOC653455      | XM_927464    | similar to deubiquitinating enzyme 3                                                   |
| 4 | 2.29E-03 | LOC653465      | XM_377837    | similar to deubiquitinating enzyme 3                                                   |
| 4 | 3.25E-03 | LOC653543      | XM_928000    | similar to double homeobox, 4                                                          |
| 4 | 4.78E-03 | MLF1IP         | BC031520     | MLF1 interacting protein                                                               |
| 4 | 5.11E-03 | SH3BP2         | BC022996     | SH3-domain binding protein 2                                                           |
| 4 | 6.37E-03 | LOC653549      | XM_928031    | similar to double homeobox, 4                                                          |
| 4 | 6.80E-03 | RGS12          | NM_198430    | regulator of G-protein signalling 12                                                   |
| 4 | 6.90E-03 | DDIT4L         | NM_145244    | DNA-damage-inducible transcript 4-like                                                 |
| 4 | 6.90E-03 | LOC402110      | NM_001013695 | hypothetical LOC402110                                                                 |
| 5 | 0.00E+00 | CEP72          | BC000132     | centrosomal protein 72kDa                                                              |
| 5 | 0.00E+00 | LOC153561      | BC035411     | hypothetical protein LOC153561                                                         |
| 5 | 0.00E+00 | KIAA1909       | AK125163     | KIAA1909 protein                                                                       |
| 5 | 0.00E+00 | TPPP           | NM_007030    | brain-specific protein p25 alpha                                                       |
| 5 | 0.00E+00 | PCDH12         | NM_016580    | protocadherin 12                                                                       |
| 5 | 0.00E+00 | FLJ40092       | AK097411     | FLJ40092 protein                                                                       |
| 5 | 0.00E+00 | ZDHHC11        | NM_024786    | zinc finger, DHHC-type containing 11                                                   |
| 5 | 1.44E-03 | LOC653866      | BC064557     | similar to TFIIF basal transcription factor complex p44 subunit                        |
| 5 | 1.44E-03 | GTF2H2         | NM_001515    | general transcription factor IIH, polypeptide 2, 44kDa                                 |
| 5 | 1.44E-03 | DKFZP686P18101 | BC105980     | similar to TFIIF basal transcription factor complex p44 subunit                        |
| 5 | 3.10E-03 | THOC3          | BC068499     | THO complex 3                                                                          |
| 5 | 3.51E-03 | SDHA           | BC041016     | succinate dehydrogenase complex, subunit A, flavoprotein (Fp)                          |
| 5 | 4.39E-03 | B4GALT7        | NM_007255    | xylosylprotein beta 1,4-galactosyltransferase, polypeptide 7 (galactosyltransferase I) |
| 5 | 5.01E-03 | ANKHD1         | NM_017978    | ankyrin repeat and KH domain containing 1                                              |
| 5 | 5.01E-03 | MASK-BP3       | NM_020690    | MASK-4E-BP3 alternate reading frame gene                                               |
| 5 | 5.11E-03 | SLC35A4        | AF445025     | solute carrier family 35, member A4                                                    |
| 5 | 5.11E-03 | APBB3          | NM_006051    | amyloid beta (A4) precursor protein-binding, family B, member 3                        |
| 5 | 6.37E-03 | UBLCP1         | NM_145049    | ubiquitin-like domain containing CTD phosphatase 1                                     |
| 5 | 6.37E-03 | AHRR           | NM_020731    | aryl-hydrocarbon receptor repressor                                                    |
| 5 | 6.80E-03 | HSPA4          | NM_002154    | heat shock 70kDa protein 4                                                             |
| 5 | 6.80E-03 | DKFZP686M0199  | XM_932452    | similar to TFIIF basal transcription factor complex p44 subunit                        |

|   |          |           |              |                                                                                           |
|---|----------|-----------|--------------|-------------------------------------------------------------------------------------------|
| 5 | 6.80E-03 | LOC643984 | XM_927234    | similar to nuclear pore membrane protein 121                                              |
| 5 | 6.90E-03 | UTP15     | NM_032175    | UTP15, U3 small nucleolar ribonucleoprotein, homolog (yeast)                              |
| 5 | 6.90E-03 | ANKRA2    | NM_023039    | ankyrin repeat, family A (RFXANK-like), 2                                                 |
| 5 | 7.02E-03 | MSX2      | NM_002449    | msh homeobox homolog 2 (Drosophila)                                                       |
| 5 | 7.89E-03 | MRPL36    | BC104652     | mitochondrial ribosomal protein L36                                                       |
| 5 | 7.89E-03 | NDUFS6    | NM_004553    | NADH dehydrogenase (ubiquinone) Fe-S protein 6, 13kDa (NADH-coenzyme Q reductase)         |
| 5 | 9.45E-03 | LOC646652 | XM_929595    | integral membrane glycoprotein-like                                                       |
| 6 | 0.00E+00 | TNXB      | BC033740     | tenascin XB                                                                               |
| 6 | 0.00E+00 | WISP3     | NM_003880    | WNT1 inducible signaling pathway protein 3                                                |
| 6 | 0.00E+00 | DDR1      | NM_001954    | discoidin domain receptor family, member 1                                                |
| 6 | 0.00E+00 | LOC653483 | AB016898     | similar to myeloid/lymphoid or mixed-lineage leukemia                                     |
| 6 | 0.00E+00 | MLLT4     | NM_001040000 | myeloid/lymphoid or mixed-lineage leukemia                                                |
| 6 | 0.00E+00 | SF3B5     | BC000198     | splicing factor 3b, subunit 5, 10kDa                                                      |
| 6 | 0.00E+00 | EFHC1     | BC020210     | EF-hand domain (C-terminal) containing 1                                                  |
| 6 | 9.40E-04 | LTB       | BC069330     | lymphotoxin beta (TNF superfamily, member 3)                                              |
| 6 | 9.40E-04 | LST1      | NM_205840    | leukocyte specific transcript 1                                                           |
| 6 | 1.44E-03 | CYP21A2   | NM_000500    | cytochrome P450, family 21, subfamily A, polypeptide 2                                    |
| 6 | 1.44E-03 | TAP1      | BC014081     | transporter 1, ATP-binding cassette, sub-family B (MDR/TAP)                               |
| 6 | 1.44E-03 | PSMB9     | NM_002800    | proteasome (prosome, macropain) subunit, beta type, 9 (large multifunctional peptidase 2) |
| 6 | 2.29E-03 | NEU1      | NM_000434    | sialidase 1 (lysosomal sialidase)                                                         |
| 6 | 3.10E-03 | TAP2      | BC002751     | transporter 2, ATP-binding cassette, sub-family B (MDR/TAP)                               |
| 6 | 3.51E-03 | PPP2R5D   | NM_006245    | protein phosphatase 2, regulatory subunit B (B56), delta isoform                          |
| 6 | 3.51E-03 | PEX6      | BC048331     | peroxisomal biogenesis factor 6                                                           |
| 6 | 4.39E-03 | C6orf154  | NM_001012974 | chromosome 6 open reading frame 154                                                       |
| 6 | 4.39E-03 | POLR1C    | NM_203290    | polymerase (RNA) I polypeptide C, 30kDa                                                   |
| 6 | 4.78E-03 | CUTA      | NM_001014840 | cutA divalent cation tolerance homolog (E. coli)                                          |
| 6 | 5.11E-03 | C4A       | NM_007293    | complement component 4A (Rodgers blood group)                                             |
| 6 | 5.11E-03 | AGPAT1    | NM_006411    | 1-acylglycerol-3-phosphate O-acyltransferase 1                                            |
| 6 | 5.11E-03 | RNF5      | NM_006913    | ring finger protein 5                                                                     |
| 6 | 6.37E-03 | C6orf153  | NM_033112    | chromosome 6 open reading frame 153                                                       |
| 6 | 6.80E-03 | C4B       | NM_001002029 | complement component 4B (Childo blood group)                                              |
| 6 | 8.10E-03 | TNF       | NM_000594    | tumor necrosis factor (TNF superfamily, member 2)                                         |
| 6 | 8.10E-03 | C6orf25   | NM_138277    | chromosome 6 open reading frame 25                                                        |
| 6 | 8.10E-03 | LY6G6C    | NM_025261    | lymphocyte antigen 6 complex, locus G6C                                                   |
| 6 | 8.20E-03 | HLA-DOA   | BC013183     | major histocompatibility complex, class II, DO alpha                                      |
| 6 | 8.27E-03 | RXRβ      | X66424       | retinoid X receptor, beta                                                                 |
| 6 | 8.27E-03 | SLC39A7   | BC000645     | solute carrier family 39 (zinc transporter), member 7                                     |
| 6 | 9.45E-03 | FKBP6     | BC004168     | FK506 binding protein like                                                                |
| 6 | 9.45E-03 | CREBL1    | U31903       | cAMP responsive element binding protein-like 1                                            |
| 6 | 9.45E-03 | ZBTB9     | BC014978     | zinc finger and BTB domain containing 9                                                   |
| 7 | 0.00E+00 | LOC389517 | BC068610     | similar to Williams Beuren syndrome chromosome region 19                                  |
| 7 | 0.00E+00 | LOC441257 | BC110795     | hypothetical LOC441257                                                                    |
| 7 | 0.00E+00 | LOC643909 | XM_933690    | region containing similar to Williams Beuren syndrome chromosome region                   |
| 7 | 0.00E+00 | LOC441258 | XM_933682    | similar to Williams Beuren syndrome chromosome region 19                                  |
| 7 | 0.00E+00 | LOC647090 | XM_930104    | similar to zinc finger protein 658B                                                       |
| 7 | 0.00E+00 | LOC647089 | XM_934342    | hypothetical protein LOC647089                                                            |
| 7 | 0.00E+00 | FLJ21767  | XM_934280    | hypothetical protein FLJ21767                                                             |
| 7 | 0.00E+00 | BLVRA     | NM_000712    | biliverdin reductase A                                                                    |
| 7 | 1.07E-03 | SLC4A2    | NM_003040    | solute carrier family 4, anion exchanger, member 2                                        |
| 7 | 1.44E-03 | LOC643862 | XM_933520    | region containing similar to Williams Beuren syndrome chromosome region                   |
| 7 | 3.51E-03 | TRIM50    | BC112152     | tripartite motif-containing 50                                                            |
| 7 | 3.51E-03 | FKBP6     | BC036817     | FK506 binding protein 6, 36kDa                                                            |

|   |          |           |              |                                                                         |
|---|----------|-----------|--------------|-------------------------------------------------------------------------|
| 7 | 3.51E-03 | DTX2      | BC064535     | deltex homolog 2 (Drosophila)                                           |
| 7 | 5.11E-03 | POLR2J    | BC024165     | polymerase (RNA) II (DNA directed) polypeptide J, 13.3kDa               |
| 7 | 6.37E-03 | LOC442609 | XM_934921    | similar to Williams Beuren syndrome chromosome region 19                |
| 7 | 6.37E-03 | LOC643920 | XM_933696    | region containing similar to Williams Beuren syndrome chromosome region |
| 7 | 6.37E-03 | GATS      | AK055399     | opposite strand transcription unit to STAG3                             |
| 7 | 6.38E-03 | POLR2J2   | BC050405     | DNA directed RNA polymerase II polypeptide J-related gene               |
| 7 | 6.80E-03 | RHBDD2    | NM_020684    | rhomboid domain containing 2                                            |
| 7 | 6.80E-03 | LOC645352 | XM_928394    | hypothetical protein LOC645352                                          |
| 7 | 6.80E-03 | KIAA1505  | NM_020879    | KIAA1505 protein                                                        |
| 7 | 9.70E-03 | C7orf28B  | NM_198097    | chromosome 7 open reading frame 28B                                     |
| 7 | 9.70E-03 | C7orf28A  | BC067810     | chromosome 7 open reading frame 28A                                     |
| 8 | 0.00E+00 | LOC645701 | XM_928712    | hypothetical protein LOC645701                                          |
| 8 | 0.00E+00 | FAM90A9   | XM_496956    | family with sequence similarity 90, member A9                           |
| 8 | 0.00E+00 | LOC645718 | XM_928726    | hypothetical protein LOC645718                                          |
| 8 | 0.00E+00 | DOK2      | BC032623     | docking protein 2, 56kDa                                                |
| 8 | 0.00E+00 | LOC645362 | XM_928404    | hypothetical protein LOC645362                                          |
| 8 | 0.00E+00 | LOC349196 | BC093747     | hypothetical protein LOC349196                                          |
| 8 | 0.00E+00 | LOC441314 | XM_496946    | hypothetical LOC441314                                                  |
| 8 | 0.00E+00 | KIAA1967  | NM_199205    | KIAA1967                                                                |
| 8 | 0.00E+00 | ZNF703    | NM_025069    | zinc finger protein 703                                                 |
| 8 | 0.00E+00 | LOC642867 | XM_931130    | hypothetical protein LOC642867                                          |
| 8 | 0.00E+00 | ZNF7      | NM_003416    | zinc finger protein 7 (KOX 4, clone HF.16)                              |
| 8 | 0.00E+00 | EXT1      | BC001174     | exostoses (multiple) 1                                                  |
| 8 | 0.00E+00 | REXO1L1   | NM_172239    | REX1, RNA exonuclease 1 homolog (S. cerevisiae)-like 1                  |
| 8 | 0.00E+00 | REXO1L5P  | XM_496983    | REX1, RNA exonuclease 1 homolog (S. cerevisiae)-like 5 (pseudogene)     |
| 8 | 0.00E+00 | REXO1L7P  | XM_496985    | REX1, RNA exonuclease 1 homolog (S. cerevisiae)-like 7 (pseudogene)     |
| 8 | 0.00E+00 | REXO1L2P  | XM_496984    | REX1, RNA exonuclease 1 homolog (S. cerevisiae)-like 2 (pseudogene)     |
| 8 | 0.00E+00 | REXO1L6P  | XM_376784    | REX1, RNA exonuclease 1 homolog (S. cerevisiae)-like 6 (pseudogene)     |
| 8 | 0.00E+00 | MGC70857  | BC073936     | similar to RIKEN cDNA C030006K11 gene                                   |
| 8 | 0.00E+00 | LRRC24    | BC111067     | leucine rich repeat containing 24                                       |
| 8 | 1.95E-03 | LYPD2     | NM_205545    | LY6/PLAUR domain containing 2                                           |
| 8 | 4.78E-03 | LOC653333 | XM_932804    | similar to CG7889-PA                                                    |
| 8 | 4.78E-03 | FAM86B1   | AK098138     | family with sequence similarity 86, member B1                           |
| 8 | 5.11E-03 | LY6E      | NM_002346    | lymphocyte antigen 6 complex, locus E                                   |
| 8 | 5.11E-03 | SPATC1    | BC050390     | spermatogenesis and centriole associated 1                              |
| 8 | 5.85E-03 | HSF1      | NM_005526    | heat shock transcription factor 1                                       |
| 8 | 6.37E-03 | BIN3      | NM_018688    | bridging integrator 3                                                   |
| 8 | 6.37E-03 | TRIM35    | BC069226     | tripartite motif-containing 35                                          |
| 8 | 6.37E-03 | PTK2B     | NM_004103    | PTK2B protein tyrosine kinase 2 beta                                    |
| 8 | 6.80E-03 | LOC441325 | XM_496954    | hypothetical LOC441325                                                  |
| 8 | 6.80E-03 | LOC645689 | XM_928698    | hypothetical protein LOC645689                                          |
| 8 | 6.80E-03 | CALB1     | BC006478     | calbindin 1, 28kDa                                                      |
| 8 | 6.90E-03 | FAM90A10  | XM_496957    | family with sequence similarity 90, member A10                          |
| 8 | 8.20E-03 | LOC645681 | XM_928690    | hypothetical protein LOC645681                                          |
| 8 | 8.20E-03 | FAM90A8   | XM_496953    | family with sequence similarity 90, member A8                           |
| 8 | 9.29E-03 | LOC645673 | XM_928684    | hypothetical protein LOC645673                                          |
| 8 | 9.45E-03 | SCRIB     | AF318352     | scribbled homolog (Drosophila)                                          |
| 8 | 9.45E-03 | RGS20     | BC063490     | regulator of G-protein signalling 20                                    |
| 8 | 9.45E-03 | LOC441326 | XM_496955    | hypothetical LOC441326                                                  |
| 8 | 9.45E-03 | LOC645660 | XM_928674    | hypothetical protein LOC645660                                          |
| 8 | 9.45E-03 | LOC645732 | XM_928743    | hypothetical protein LOC645732                                          |
| 8 | 9.45E-03 | TMEM64    | NM_001008495 | transmembrane protein 64                                                |

|    |          |               |              |                                                                                    |
|----|----------|---------------|--------------|------------------------------------------------------------------------------------|
| 8  | 9.45E-03 | RBM35A        | NM_001034915 | RNA binding motif protein 35A                                                      |
| 9  | 0.00E+00 | LOC504188     | NM_001013404 | hypothetical LOC504188                                                             |
| 9  | 0.00E+00 | RP11-561O23.3 | BC103887     | FOXD4-like 2                                                                       |
| 9  | 0.00E+00 | LOC653404     | XM_928867    | similar to FOXD4-like 2                                                            |
| 9  | 0.00E+00 | LOC440896     | XM_932224    | hypothetical gene supported by AK127288%3B AY343901                                |
| 9  | 0.00E+00 | FLJ00038      | XM_930631    | CXYorf1-related protein                                                            |
| 9  | 0.00E+00 | LOC158318     | NM_001024608 | similar to hypothetical protein MGC42630                                           |
| 9  | 0.00E+00 | LOC645536     | XM_928555    | similar to hypothetical protein MGC13005                                           |
| 9  | 0.00E+00 | LOC653305     | XM_926770    | similar to similar to chromosome 2 open reading frame 27                           |
| 9  | 0.00E+00 | LOC643428     | XM_926764    | hypothetical protein LOC643428                                                     |
| 9  | 0.00E+00 | LOC643451     | XM_931554    | hypothetical protein LOC643451                                                     |
| 9  | 0.00E+00 | FIBCD1        | AK027716     | fibrinogen C domain containing 1                                                   |
| 9  | 0.00E+00 | BAG1          | BC014774     | BCL2-associated athanogene                                                         |
| 9  | 0.00E+00 | CHMP5         | NM_016410    | omatin modifying protein 5                                                         |
| 9  | 0.00E+00 | MGC42630      | NM_175923    | hypothetical protein MGC42630                                                      |
| 9  | 0.00E+00 | IL11RA        | NM_147162    | interleukin 11 receptor, alpha                                                     |
| 9  | 0.00E+00 | LOC643473     | XM_926797    | hypothetical protein LOC643473                                                     |
| 9  | 0.00E+00 | LOC644175     | XM_927374    | hypothetical protein LOC644175                                                     |
| 9  | 0.00E+00 | LOC643466     | XM_926789    | hypothetical protein LOC643466                                                     |
| 9  | 9.40E-04 | MAN1B1        | AF145732     | mannosidase, alpha, class 1B, member 1                                             |
| 9  | 9.40E-04 | LOC286260     | XM_926851    | hypothetical protein LOC286260                                                     |
| 9  | 1.44E-03 | ARID3C        | NM_001017363 | AT rich interactive domain 3C (BRIGHT- like)                                       |
| 9  | 2.77E-03 | SLC35D2       | BC100278     | solute carrier family 35, member D2                                                |
| 9  | 2.92E-03 | NDOR1         | BC093782     | NADPH dependent diflavin oxidoreductase 1                                          |
| 9  | 2.92E-03 | MGC14327      | BC067786     | hypothetical protein MGC14327                                                      |
| 9  | 2.92E-03 | FOXD4L3       | NM_199358    | forkhead box D4-like 3                                                             |
| 9  | 2.92E-03 | LOC644781     | XM_496584    | similar to hypothetical gene supported by AK127288%3B AY343901                     |
| 9  | 3.10E-03 | LOC644769     | XM_932357    | hypothetical protein LOC644769                                                     |
| 9  | 3.25E-03 | ATP6V1G1      | BC008452     | ATPase, H+ transporting, lysosomal 13kDa, V1 subunit G1                            |
| 9  | 3.25E-03 | CACNA1B       | M94173       | calcium channel, voltage-dependent, L type, alpha 1B subunit                       |
| 9  | 3.25E-03 | JAK2          | NM_004972    | Janus kinase 2 (a protein tyrosine kinase)                                         |
| 9  | 4.39E-03 | KGFLP1        | AY098593     | keratinocyte growth factor-like protein 1                                          |
| 9  | 4.39E-03 | LOC643666     | XM_926971    | similar to Keratinocyte growth factor precursor (KGF) (Fibroblast growth factor 7) |
| 9  | 4.39E-03 | LOC441408     | XM_497029    | hypothetical LOC441408                                                             |
| 9  | 5.11E-03 | LOC642429     | XM_925943    | similar to chromosome 9 open reading frame 36                                      |
| 9  | 6.37E-03 | SLC31A2       | BC026252     | solute carrier family 31 (copper transporters), member 2                           |
| 9  | 6.80E-03 | RPL35         | BC094828     | ribosomal protein L35                                                              |
| 9  | 8.20E-03 | DNAI1         | BC030583     | dynein, axonemal, intermediate polypeptide 1                                       |
| 9  | 8.20E-03 | C9orf25       | BC041009     | chromosome 9 open reading frame 25                                                 |
| 9  | 8.27E-03 | LOC554249     | BC084570     | hypothetical LOC554249                                                             |
| 9  | 8.27E-03 | RP11-262H14.4 | AK092305     | hypothetical protein MGC21881                                                      |
| 9  | 8.27E-03 | FLJ20444      | XM_933028    | hypothetical protein FLJ20444                                                      |
| 9  | 9.29E-03 | KGFLP2        | NM_001039113 | keratinocyte growth factor-like protein 2                                          |
| 10 | 0.00E+00 | C10orf108     | NM_001012714 | chromosome 10 open reading frame 108                                               |
| 10 | 0.00E+00 | LOC642422     | XM_926167    | hypothetical protein LOC642422                                                     |
| 10 | 1.44E-03 | LOC399744     | NM_001013665 | hypothetical LOC399744                                                             |
| 10 | 0.00E+00 | DUX1          | NM_012146    | double homeobox, 1                                                                 |
| 10 | 0.00E+00 | LOC440013     | XM_495854    | similar to double homeobox 4c                                                      |
| 10 | 0.00E+00 | LOC440017     | XM_495858    | similar to double homeobox 4c                                                      |
| 10 | 0.00E+00 | MTG1          | BC026039     | mitochondrial GTPase 1 homolog (S. cerevisiae)                                     |
| 10 | 8.10E-03 | CDH23         | AY563162     | cadherin-like 23                                                                   |
| 11 | 0.00E+00 | LOC642369     | XM_925901    | hypothetical protein LOC642369                                                     |

|    |          |           |              |                                                                                   |
|----|----------|-----------|--------------|-----------------------------------------------------------------------------------|
| 11 | 0.00E+00 | IFITM3    | NM_021034    | interferon induced transmembrane protein 3 (1-8U)                                 |
| 11 | 0.00E+00 | CENTD2    | NM_139181    | centaurin, delta 2                                                                |
| 11 | 0.00E+00 | EHBPL1    | XM_934343    | EH domain binding protein 1-like 1                                                |
| 11 | 0.00E+00 | ZW10      | NM_004724    | ZW10, kinetochore associated, homolog (Drosophila)                                |
| 11 | 0.00E+00 | CCDC15    | NM_025004    | coiled-coil domain containing 15                                                  |
| 11 | 1.88E-03 | KRTAP5-6  | NM_001012416 | keratin associated protein 5-6                                                    |
| 11 | 4.39E-03 | ESRRA     | L38487       | estrogen-related receptor alpha                                                   |
| 11 | 4.39E-03 | DPP3      | NM_005700    | dipeptidyl-peptidase 3                                                            |
| 11 | 4.39E-03 | PHOX2A    | NM_005169    | paired-like (aristales) homeobox 2a                                               |
| 11 | 7.52E-03 | FIBP      | BC017448     | fibroblast growth factor (acidic) intracellular binding protein                   |
| 11 | 7.52E-03 | CCDC85B   | NM_006848    | coiled-coil domain containing 85B                                                 |
| 11 | 8.77E-03 | LOC642724 | XM_927562    | similar to mucin 6, gastric                                                       |
| 11 | 8.77E-03 | MUC6      | AK096772     | mucin 6, oligomeric mucus/gel-forming                                             |
| 11 | 8.77E-03 | PSMC3     | BC106920     | proteasome (prosome, macropain) 26S subunit, ATPase, 3                            |
| 11 | 8.77E-03 | DAK       | BC001341     | dihydroxyacetone kinase 2 homolog (S. cerevisiae)                                 |
| 11 | 8.77E-03 | DDB1      | BC050530     | damage-specific DNA binding protein 1, 127kDa                                     |
| 11 | 9.57E-03 | TNKS1BP1  | AK124903     | tankyrase 1 binding protein 1, 182kDa                                             |
| 12 | 0.00E+00 | ATN1      | NM_001007026 | atrophin 1                                                                        |
| 12 | 0.00E+00 | IGFBP6    | NM_002178    | insulin-like growth factor binding protein 6                                      |
| 12 | 0.00E+00 | SOAT2     | NM_003578    | sterol O-acyltransferase 2                                                        |
| 12 | 0.00E+00 | MBD6      | AK093078     | methyl-CpG binding domain protein 6                                               |
| 12 | 0.00E+00 | DDIT3     | NM_004083    | DNA-damage-inducible transcript 3                                                 |
| 12 | 0.00E+00 | PXN       | BC052611     | paxillin                                                                          |
| 12 | 1.88E-03 | HOXC8     | NM_022658    | homeobox C8                                                                       |
| 12 | 4.39E-03 | WSB2      | NM_018639    | WD repeat and SOCS box-containing 2                                               |
| 12 | 8.77E-03 | NDUFA4L2  | BC011910     | NADH dehydrogenase (ubiquinone) 1 alpha subcomplex, 4-like 2                      |
| 13 | 0.00E+00 | GRK1      | NM_002929    | G protein-coupled receptor kinase 1                                               |
| 14 | 3.10E-03 | ISGF3G    | NM_006084    | interferon-stimulated transcription factor 3, gamma 48kDa                         |
| 14 | 8.10E-03 | TDP1      | BC006083     | tyrosyl-DNA phosphodiesterase 1                                                   |
| 14 | 8.10E-03 | C14orf143 | BX247991     | chromosome 14 open reading frame 143                                              |
| 14 | 9.57E-03 | AP1G2     | BC051833     | adaptor-related protein complex 1, gamma 2 subunit                                |
| 15 | 0.00E+00 | LOC400968 | NM_001013678 | hypothetical LOC400968                                                            |
| 15 | 0.00E+00 | PPCDC     | BC014409     | phosphopantothienoylcysteine decarboxylase                                        |
| 15 | 0.00E+00 | FLJ22795  | AF316855     | hypothetical protein FLJ22795                                                     |
| 15 | 4.39E-03 | TUBGCP5   | NM_052903    | tubulin, gamma complex associated protein 5                                       |
| 16 | 0.00E+00 | CCDC95    | NM_173618    | coiled-coil domain containing 95                                                  |
| 16 | 0.00E+00 | LOC339047 | BC046145     | hypothetical protein LOC339047                                                    |
| 16 | 0.00E+00 | LOC441763 | XM_930284    | hypothetical LOC441763                                                            |
| 16 | 0.00E+00 | LOC649159 | NM_001040069 | similar to CG7467-PA, isoform A                                                   |
| 16 | 0.00E+00 | HS3ST6    | NM_001009606 | heparan sulfate (glucosamine) 3-O-sulfotransferase 6                              |
| 16 | 0.00E+00 | TRAF7     | BC024267     | TNF receptor-associated factor 7                                                  |
| 16 | 0.00E+00 | AMDHD2    | AF132948     | amidohydrolase domain containing 2                                                |
| 16 | 0.00E+00 | SRCAP     | BC052963     | Snf2-related CBP activator protein                                                |
| 16 | 0.00E+00 | CBFA2T3   | NM_175931    | core-binding factor, runt domain, alpha subunit 2%3B translocated to, 3           |
| 16 | 2.39E-03 | GALNS     | NM_000512    | galactosamine (N-acetyl)-6-sulfate sulfatase                                      |
| 16 | 2.39E-03 | HSPC176   | BC017440     | hematopoietic stem/progenitor cells 176                                           |
| 16 | 2.39E-03 | NULP1     | AF130092     | NULP1                                                                             |
| 16 | 5.85E-03 | SMPD3     | BC112238     | sphingomyelin phosphodiesterase 3, neutral membrane (neutral sphingomyelinase II) |
| 16 | 5.85E-03 | LOC643895 | XM_929840    | hypothetical protein LOC643895                                                    |
| 17 | 0.00E+00 | LOC653673 | XM_935258    | similar to TBC1 domain family, member 3B                                          |
| 17 | 0.00E+00 | TBC1D3C   | BC071680     | TBC1 domain family, member 3C                                                     |
| 17 | 0.00E+00 | TBC1D3    | BC078140     | TBC1 domain family, member 3                                                      |



|           |          |              |              |                                                                                           |
|-----------|----------|--------------|--------------|-------------------------------------------------------------------------------------------|
| 17        | 0.00E+00 | TBC1D3B      | BC075809     | TBC1 domain family, member 3B                                                             |
| 17        | 0.00E+00 | LOC653682    | XM_935326    | similar to TBC1 domain family member 3 (Rab GTPase-activating protein PRC17)              |
| 17        | 5.85E-03 | SIRT7        | NM_016538    | sirtuin (silent mating type information regulation 2 homolog) 7 ( <i>S. cerevisiae</i> )  |
| 17        | 7.52E-03 | OTOP2        | NM_178160    | otopetrin 2                                                                               |
| 17        | 7.52E-03 | USH1G        | NM_173477    | Usher syndrome 1G (autosomal recessive)                                                   |
| 17        | 8.77E-03 | ORMDL3       | NM_139280    | ORM1-like 3 ( <i>S. cerevisiae</i> )                                                      |
| 17        | 8.77E-03 | FLJ45079     | NM_001001685 | FLJ45079 protein                                                                          |
| 19        | 0.00E+00 | C19orf35     | NM_198532    | chromosome 19 open reading frame 35                                                       |
| 19        | 0.00E+00 | KCNN4        | NM_002250    | potassium intermediate/small conductance calcium-activated channel, subfamily N, member 4 |
| 19        | 0.00E+00 | DLL3         | NM_016941    | delta-like 3 ( <i>Drosophila</i> )                                                        |
| 19        | 0.00E+00 | KCNC3        | NM_004977    | potassium voltage-gated channel, Shaw-related subfamily, member 3                         |
| 19        | 0.00E+00 | EDG6         | BC014970     | endothelial differentiation, lysophosphatidic acid G-protein-coupled receptor, 6          |
| 19        | 0.00E+00 | ARHGEF1      | BC035127     | Rho guanine nucleotide exchange factor (GEF) 1                                            |
| 19        | 0.00E+00 | ZNF272       | NM_006635    | zinc finger protein 272                                                                   |
| 19        | 0.00E+00 | LOC147650    | BC104209     | hypothetical protein LOC147650                                                            |
| 19        | 1.88E-03 | ANGPTL6      | NM_031917    | angiopoietin-like 6                                                                       |
| 19        | 1.88E-03 | PPAN         | BC033202     | peter pan homolog ( <i>Drosophila</i> )                                                   |
| 19        | 1.88E-03 | ZNF42        | NM_198055    | zinc finger protein 42 (myeloid-specific retinoic acid-responsive)                        |
| 19        | 1.88E-03 | MGC2752      | NM_023939    | hypothetical protein MGC2752                                                              |
| 19        | 2.39E-03 | GPR42        | NM_005305    | G protein-coupled receptor 42                                                             |
| 19        | 2.39E-03 | FFAR3        | BC035657     | free fatty acid receptor 3                                                                |
| 19        | 2.39E-03 | GNG8         | BC095514     | guanine nucleotide binding protein (G protein), gamma 8                                   |
| 19        | 3.10E-03 | ZNF565       | NM_152477    | zinc finger protein 565                                                                   |
| 19        | 3.10E-03 | NUP62        | BC014842     | nucleoporin 62kDa                                                                         |
| 20        | 0.00E+00 | LOC391257    | BC065723     | SUMO1 pseudogene 1                                                                        |
| 20        | 0.00E+00 | C20orf151    | AK128718     | chromosome 20 open reading frame 151                                                      |
| 20        | 0.00E+00 | C20orf59     | NM_022082    | chromosome 20 open reading frame 59                                                       |
| 20        | 1.88E-03 | CSNK2A1      | NM_177560    | casein kinase 2, alpha 1 polypeptide                                                      |
| 21        | 0.00E+00 | NDUFV3       | NM_021075    | NADH dehydrogenase (ubiquinone) flavoprotein 3, 10kDa                                     |
| 21        | 4.39E-03 | TCPI0L       | BC033855     | t-complex 10 (mouse)-like                                                                 |
| 21        | 8.77E-03 | ZNF294       | NM_015565    | zinc finger protein 294                                                                   |
| 22        | 0.00E+00 | ACTBL1       | NM_001004053 | actin, beta-like 1                                                                        |
| 22        | 0.00E+00 | LOC653257    | XM_932654    | similar to Gamma-glutamyltranspeptidase 1 precursor (Gamma-glutamyltransferase 1)         |
| 22        | 0.00E+00 | DKFZp434K191 | BC051721     | hypothetical protein DKFZp434K191                                                         |
| 22        | 0.00E+00 | LOC643318    | XM_932716    | hypothetical protein LOC643318                                                            |
| 17_random | 7.52E-03 | ANAPC11      | AF151048     | APC11 anaphase promoting complex subunit 11 homolog (yeast)                               |
| X         | 0.00E+00 | SLC38A5      | BC019246     | solute carrier family 38, member 5                                                        |
| X         | 1.88E-03 | GPR101       | BC069439     | G protein-coupled receptor 101                                                            |
| X         | 3.10E-03 | FAM39A       | XM_377073    | family with sequence similarity 39, member A                                              |
| Y         | 0.00E+00 | LOC642499    | XM_925999    | similar to chromosome Y open reading frame 16                                             |
| Y         | 0.00E+00 | TSPY1        | U58096       | testis specific protein, Y-linked 1                                                       |
| Y         | 0.00E+00 | LOC653168    | XM_926605    | similar to testis specific protein, Y-linked 1                                            |
| Y         | 0.00E+00 | TSPY2        | BC075016     | testis specific protein, Y-linked 2                                                       |

Table S2. p200 Target Genes Identified by ChIP-chip (FDR 0.01-0.05).

| CHR | FDR      | Name      | Accession    | Description                                                                               |
|-----|----------|-----------|--------------|-------------------------------------------------------------------------------------------|
| 1   | 1.00E-02 | CYB561D1  | BX647509     | cytoome b-561 domain containing 1                                                         |
| 1   | 1.00E-02 | SNAPAP    | BC000761     | SNAP-associated protein                                                                   |
| 1   | 1.00E-02 | KCNN3     | NM_170782    | potassium intermediate/small conductance calcium-activated channel, subfamily N, member 3 |
| 1   | 1.00E-02 | SCAMP3    | NM_005698    | secretory carrier membrane protein 3                                                      |
| 1   | 1.00E-02 | PVRL4     | AF218028     | poliovirus receptor-related 4                                                             |
| 1   | 1.00E-02 | ARHGAP30  | NM_181720    | Rho GTPase activating protein 30                                                          |
| 1   | 1.00E-02 | UBXD3     | NM_152376    | UBX domain containing 3                                                                   |
| 1   | 1.00E-02 | CD52      | NM_001803    | CD52 molecule                                                                             |
| 1   | 1.00E-02 | UBXD5     | AK097368     | UBX domain containing 5                                                                   |
| 1   | 1.00E-02 | BMP8A     | AK024413     | bone morphogenetic protein 8a                                                             |
| 1   | 1.00E-02 | LOC664727 | AK093659     | hypothetical protein LOC664727                                                            |
| 1   | 1.00E-02 | TMEM69    | BC064539     | transmembrane protein 69                                                                  |
| 1   | 1.00E-02 | MRPL37    | BC000041     | mitochondrial ribosomal protein L37                                                       |
| 1   | 1.00E-02 | LOC606495 | BC071735     | hypothetical protein LOC606495                                                            |
| 1   | 1.10E-02 | LOC388692 | NM_001013644 | hypothetical gene supported by AK123662                                                   |
| 1   | 1.21E-02 | MSTO1     | AY334564     | misato homolog 1 (Drosophila)                                                             |
| 1   | 1.21E-02 | OR2T34    | NM_001001821 | olfactory receptor, family 2, subfamily T, member 34                                      |
| 1   | 1.21E-02 | HYI       | AY037165     | hydroxypyruvate isomerase homolog (E. coli)                                               |
| 1   | 1.25E-02 | FAM63A    | AK125959     | family with sequence similarity 63, member A                                              |
| 1   | 1.25E-02 | PRUNE     | AF123538     | prune homolog (Drosophila)                                                                |
| 1   | 1.25E-02 | S100A14   | NM_020672    | S100 calcium binding protein A14                                                          |
| 1   | 1.25E-02 | S100A16   | BC019099     | S100 calcium binding protein A16                                                          |
| 1   | 1.25E-02 | OR10K1    | NM_001004473 | olfactory receptor, family 10, subfamily K, member 1                                      |
| 1   | 1.25E-02 | LOC641706 | XM_925794    | hypothetical protein LOC641706                                                            |
| 1   | 1.25E-02 | LOC641694 | XM_925780    | similar to SLIT-ROBO Rho GTPase-activating protein 2 (srGAP2) (Formin-binding protein 2)  |
| 1   | 1.25E-02 | C1orf35   | AK126087     | chromosome 1 open reading frame 35                                                        |
| 1   | 1.25E-02 | IRF2BP2   | BC020516     | interferon regulatory factor 2 binding protein 2                                          |
| 1   | 1.25E-02 | EYA3      | BC041667     | eyes absent homolog 3 (Drosophila)                                                        |
| 1   | 1.25E-02 | ZNF643    | BC017498     | zinc finger protein 643                                                                   |
| 1   | 1.25E-02 | SLFNL1    | BC050353     | schlafen-like 1                                                                           |
| 1   | 1.25E-02 | B4GALT2   | NM_001005417 | UDP-Gal:betaGlcNAc beta 1,4- galactosyltransferase, polypeptide 2                         |
| 1   | 1.26E-02 | C1orf69   | NM_001010867 | chromosome 1 open reading frame 69                                                        |
| 1   | 1.26E-02 | MYCL1     | NM_005376    | v-myc myelocytomatosis viral oncogene homolog 1, lung carcinoma derived (avian)           |
| 1   | 1.26E-02 | FOXJ3     | NM_014947    | forkhead box J3                                                                           |
| 1   | 1.32E-02 | LOC440607 | NM_001017986 | Fc-gamma receptor I B2                                                                    |
| 1   | 1.32E-02 | ISG20L2   | NM_030980    | interferon stimulated exonuclease gene 20kDa-like 2                                       |
| 1   | 1.32E-02 | C1orf66   | CR598294     | chromosome 1 open reading frame 66                                                        |
| 1   | 1.32E-02 | NAV1      | BX648460     | neuron navigator 1                                                                        |
| 1   | 1.32E-02 | PPIH      | BC003412     | peptidylprolyl isomerase H (cyclophilin H)                                                |
| 1   | 1.36E-02 | FLJ16478  | NM_001004341 | FLJ16478 protein                                                                          |
| 1   | 1.46E-02 | CHML      | NM_001821    | choroideremia-like (Rab escort protein 2)                                                 |
| 1   | 1.48E-02 | CYB5R1    | BC018732     | cytoome b5 reductase 1                                                                    |
| 1   | 1.61E-02 | ICMT      | NM_012405    | isoprenylcysteine carboxyl methyltransferase                                              |
| 1   | 1.61E-02 | HES3      | NM_001024598 | hairy and enhancer of split 3 (Drosophila)                                                |
| 1   | 1.63E-02 | C1orf127  | NM_173507    | chromosome 1 open reading frame 127                                                       |
| 1   | 1.63E-02 | AP4B1     | NM_006594    | adaptor-related protein complex 4, beta 1 subunit                                         |
| 1   | 1.63E-02 | SEMA6C    | NM_030913    | sema domain, transmembrane domain (TM), and cytoplasmic domain, (semaphorin) 6C           |
| 1   | 1.63E-02 | C1orf79   | XM_934811    | chromosome 1 open reading frame 79                                                        |
| 1   | 1.63E-02 | C1orf50   | BC001508     | chromosome 1 open reading frame 50                                                        |

|   |          |           |              |                                                                                      |
|---|----------|-----------|--------------|--------------------------------------------------------------------------------------|
| 1 | 1.63E-02 | OR6Y1     | NM_001005189 | olfactory receptor, family 6, subfamily Y, member 1                                  |
| 1 | 1.63E-02 | ZBTB40    | NM_014870    | zinc finger and BTB domain containing 40                                             |
| 1 | 1.63E-02 | LYPLA2    | NM_007260    | lysophospholipase II                                                                 |
| 1 | 1.64E-02 | AMY1B     | NM_001008218 | amylase, alpha 1B%3B salivary                                                        |
| 1 | 1.64E-02 | HIST2H2BE | NM_003528    | histone 2, H2be                                                                      |
| 1 | 1.64E-02 | HIST1H2BB | BC098112     | histone 1, H2bb                                                                      |
| 1 | 1.64E-02 | HIST2H2AC | BC060324     | histone 2, H2ac                                                                      |
| 1 | 1.64E-02 | HIST2H2AB | NM_175065    | histone 2, H2ab                                                                      |
| 1 | 1.64E-02 | COPA      | BC038447     | coatomer protein complex, subunit alpha                                              |
| 1 | 1.64E-02 | NCSTN     | NM_015331    | nicastrin                                                                            |
| 1 | 1.64E-02 | KIF21B    | NM_017596    | kinesin family member 21B                                                            |
| 1 | 1.64E-02 | GUK1      | BC009914     | guanylate kinase 1                                                                   |
| 1 | 1.64E-02 | LOC644862 | XM_927954    | similar to 40S ribosomal protein S28                                                 |
| 1 | 1.64E-02 | CDC20     | BC006272     | CDC20 cell division cycle 20 homolog (S. cerevisiae)                                 |
| 1 | 1.69E-02 | FAAH      | NM_001441    | fatty acid amide hydrolase                                                           |
| 1 | 1.69E-02 | MGC52498  | AK128236     | hypothetical protein MGC52498                                                        |
| 1 | 1.70E-02 | APOBEC4   | NM_203454    | apolipoprotein B mRNA editing enzyme, catalytic polypeptide-like 4 (putative)        |
| 1 | 1.70E-02 | MIXL1     | BC111974     | Mix1 homeobox-like 1 (Xenopus laevis)                                                |
| 1 | 1.70E-02 | GUCA2B    | NM_007102    | guanylate cyclase activator 2B (uroguanylin)                                         |
| 1 | 1.70E-02 | JMJD2A    | BC002558     | jumonji domain containing 2A                                                         |
| 1 | 1.94E-02 | KCNK4     | NM_153763    | potassium voltage-gated channel, Shaw-related subfamily, member 4                    |
| 1 | 1.94E-02 | KIRREL    | AK090554     | kin of IRRE like (Drosophila)                                                        |
| 1 | 1.94E-02 | FUSIP1    | BC001107     | FUS interacting protein (serine/arginine-rich) 1                                     |
| 1 | 1.94E-02 | ZNF684    | BC091518     | zinc finger protein 684                                                              |
| 1 | 1.94E-02 | LOC644733 | XM_927832    | hypothetical protein LOC644733                                                       |
| 1 | 1.94E-02 | FLJ32011  | BC101295     | hypothetical protein FLJ32011                                                        |
| 1 | 1.94E-02 | LDLRAD1   | NM_001010978 | low density lipoprotein receptor class A domain containing 1                         |
| 1 | 1.97E-02 | MEF2D     | BC040949     | MADS box transcription enhancer factor 2, polypeptide D (myocyte enhancer factor 2D) |
| 1 | 1.97E-02 | CD1E      | NM_030893    | CD1e molecule                                                                        |
| 1 | 1.97E-02 | OR2T11    | NM_001001964 | olfactory receptor, family 2, subfamily T, member 11                                 |
| 1 | 2.07E-02 | SASS6     | BC101026     | spindle assembly 6 homolog (C. elegans)                                              |
| 1 | 2.07E-02 | CCDC76    | BC075811     | coiled-coil domain containing 76                                                     |
| 1 | 2.07E-02 | CNIH3     | NM_152495    | cornichon homolog 3 (Drosophila)                                                     |
| 1 | 2.24E-02 | ZNF687    | AK023105     | zinc finger protein 687                                                              |
| 1 | 2.24E-02 | LRRC41    | AK125827     | leucine rich repeat containing 41                                                    |
| 1 | 2.24E-02 | UQCRH     | BC093060     | ubiquinol-cytochrome c reductase hinge protein                                       |
| 1 | 2.26E-02 | WNT2B     | AK127449     | wingless-type MMTV integration site family, member 2B                                |
| 1 | 2.26E-02 | MST1      | BC044862     | macrophage stimulating 1 (hepatocyte growth factor-like)                             |
| 1 | 2.26E-02 | RASSF5    | NM_182665    | Ras association (RalGDS/AF-6) domain family 5                                        |
| 1 | 2.26E-02 | C1orf55   | BC071563     | chromosome 1 open reading frame 55                                                   |
| 1 | 2.26E-02 | CIAS1     | AB208891     | cold autoinflammatory syndrome 1                                                     |
| 1 | 2.26E-02 | PHACTR4   | BC029266     | phosphatase and actin regulator 4                                                    |
| 1 | 2.26E-02 | HECTD3    | AK056873     | HECT domain containing 3                                                             |
| 1 | 2.26E-02 | UROD      | NM_000374    | uroporphyrinogen decarboxylase                                                       |
| 1 | 2.26E-02 | MMACHC    | NM_015506    | methylmalonic aciduria (cobalamin deficiency) cblC type, with homocystinuria         |
| 1 | 2.26E-02 | TESK2     | NM_007170    | testis-specific kinase 2                                                             |
| 1 | 2.26E-02 | TMEM59    | BC003106     | transmembrane protein 59                                                             |
| 1 | 2.26E-02 | C1orf83   | AK096488     | chromosome 1 open reading frame 83                                                   |
| 1 | 2.41E-02 | PPM1J     | NM_005167    | protein phosphatase 1J (PP2C domain containing)                                      |
| 1 | 2.41E-02 | FAM19A3   | NM_001004440 | family with sequence similarity 19 (chemokine (C-C motif)-like), member A3           |
| 1 | 2.41E-02 | FLJ36116  | AK093435     | hypothetical locus LOC388666                                                         |
| 1 | 2.41E-02 | TARSL1    | AK022590     | threonyl-tRNA synthetase-like 1                                                      |

|   |          |           |              |                                                                                 |
|---|----------|-----------|--------------|---------------------------------------------------------------------------------|
| 1 | 2.41E-02 | UBAP2L    | D63478       | ubiquitin associated protein 2-like                                             |
| 1 | 2.41E-02 | C1orf43   | BC014391     | chromosome 1 open reading frame 43                                              |
| 1 | 2.41E-02 | PPOX      | NM_000309    | protoporphyrinogen oxidase                                                      |
| 1 | 2.41E-02 | SELL      | BC020758     | selectin L (lymphocyte adhesion molecule 1)                                     |
| 1 | 2.41E-02 | KIAA0090  | D42044       | KIAA0090                                                                        |
| 1 | 2.41E-02 | C1orf33   | NM_016183    | chromosome 1 open reading frame 33                                              |
| 1 | 2.41E-02 | RPS6KA1   | NM_001006665 | ribosomal protein S6 kinase, 90kDa, polypeptide 1                               |
| 1 | 2.41E-02 | SYTL1     | BC035725     | synaptotagmin-like 1                                                            |
| 1 | 2.41E-02 | PPT1      | BC008426     | palmitoyl-protein thioesterase 1 (ceroid-lipofuscinosis, neuronal 1, infantile) |
| 1 | 2.41E-02 | FOXD2     | NM_004474    | forkhead box D2                                                                 |
| 1 | 2.44E-02 | LOC643799 | XM_929213    | hypothetical protein LOC643799                                                  |
| 1 | 2.44E-02 | OBSCN     | BC043916     | obscurin, cytoskeletal calmodulin and titin-interacting RhoGEF                  |
| 1 | 2.61E-02 | OR2T4     | NM_001004696 | olfactory receptor, family 2, subfamily T, member 4                             |
| 1 | 2.61E-02 | ZNF692    | AK000538     | zinc finger protein 692                                                         |
| 1 | 2.89E-02 | LASS2     | NM_181746    | LAG1 longevity assurance homolog 2 (S. cerevisiae)                              |
| 1 | 2.89E-02 | ANXA9     | NM_003568    | annexin A9                                                                      |
| 1 | 2.89E-02 | TMEM78    | NM_001040079 | transmembrane protein 78                                                        |
| 1 | 2.89E-02 | SMYD3     | BC107725     | SET and MYND domain containing 3                                                |
| 1 | 2.89E-02 | PTAFR     | NM_000952    | platelet-activating factor receptor                                             |
| 1 | 2.92E-02 | SLC30A7   | BC064692     | solute carrier family 30 (zinc transporter), member 7                           |
| 1 | 2.92E-02 | EXTL2     | BC045681     | exostosins (multiple)-like 2                                                    |
| 1 | 2.95E-02 | CDC14A    | NM_033313    | CDC14 cell division cycle 14 homolog A (S. cerevisiae)                          |
| 1 | 2.95E-02 | AHCYL1    | AK131563     | S-adenosylhomocysteine hydrolase-like 1                                         |
| 1 | 2.95E-02 | KCNA2     | BC043564     | potassium voltage-gated channel, shaker-related subfamily, member 2             |
| 1 | 2.95E-02 | NBPF9     | XM_933976    | neuroblastoma breakpoint family, member 9                                       |
| 1 | 2.95E-02 | LOC644262 | XM_929908    | similar to profilin 1                                                           |
| 1 | 2.95E-02 | HIST2H4   | NM_003548    | histone 2, H4                                                                   |
| 1 | 2.95E-02 | H4/o      | NM_001034077 | histone H4/o                                                                    |
| 1 | 2.95E-02 | UBE2Q1    | BC015316     | ubiquitin-conjugating enzyme E2Q (putative) 1                                   |
| 1 | 2.95E-02 | OR10K2    | NM_001004476 | olfactory receptor, family 10, subfamily K, member 2                            |
| 1 | 2.95E-02 | PIGM      | NM_145167    | phosphatidylinositol glycan, class M                                            |
| 1 | 2.95E-02 | KARCA1    | NM_001007255 | kelch/ankyrin repeat containing cyclin A1 interacting protein                   |
| 1 | 2.95E-02 | FLJ23867  | AK074447     | hypothetical protein FLJ23867                                                   |
| 1 | 2.95E-02 | LOC646827 | XM_930566    | hypothetical protein LOC646827                                                  |
| 1 | 2.95E-02 | NMNAT2    | NM_170706    | nicotinamide nucleotide adenyltransferase 2                                     |
| 1 | 2.95E-02 | LOC643993 | XM_930059    | hypothetical protein LOC643993                                                  |
| 1 | 2.95E-02 | NBPF3     | AL834330     | neuroblastoma breakpoint family, member 3                                       |
| 1 | 2.95E-02 | OR2T33    | NM_001004695 | olfactory receptor, family 2, subfamily T, member 33                            |
| 1 | 2.95E-02 | OR2T5     | NM_001004697 | olfactory receptor, family 2, subfamily T, member 5                             |
| 1 | 2.95E-02 | TRIT1     | BC107569     | tRNA isopentenyltransferase 1                                                   |
| 1 | 2.95E-02 | LEPRE1    | NM_022356    | leucine proline-enriched proteoglycan (leprecan) 1                              |
| 1 | 3.27E-02 | RBM34     | NM_015014    | RNA binding motif protein 34                                                    |
| 1 | 3.27E-02 | OR2T12    | NM_001004692 | olfactory receptor, family 2, subfamily T, member 12                            |
| 1 | 3.27E-02 | ATP6V0B   | BC005876     | ATPase, H+ transporting, lysosomal 21kDa, V0 subunit b                          |
| 1 | 3.27E-02 | LRP8      | NM_033300    | low density lipoprotein receptor-related protein 8, apolipoprotein e receptor   |
| 1 | 3.40E-02 | BCAS2     | NM_005872    | breast carcinoma amplified sequence 2                                           |
| 1 | 3.40E-02 | LOC148696 | NM_001039568 | hypothetical protein LOC148696                                                  |
| 1 | 3.40E-02 | CTPS      | BC009408     | CTP synthase                                                                    |
| 1 | 3.40E-02 | FLJ35409  | NM_001001688 | FLJ35409 protein                                                                |
| 1 | 3.51E-02 | FLJ13137  | XM_930558    | hypothetical gene supported by AK125122                                         |
| 1 | 3.51E-02 | C1orf111  | NM_182581    | chromosome 1 open reading frame 111                                             |
| 1 | 3.58E-02 | UBE2J2    | AK056065     | ubiquitin-conjugating enzyme E2, J2 (UBC6 homolog, yeast)                       |

|   |          |              |              |                                                                                            |
|---|----------|--------------|--------------|--------------------------------------------------------------------------------------------|
| 1 | 3.58E-02 | LOC653604    | XM_497711    | similar to H3 histone, family 2 isoform 2                                                  |
| 1 | 3.58E-02 | CD5L         | AY358494     | CD5 molecule-like                                                                          |
| 1 | 3.58E-02 | SLC26A9      | AK127491     | solute carrier family 26, member 9                                                         |
| 1 | 3.58E-02 | HEYL         | NM_014571    | hairy/enhancer-of-split related with YRPW motif-like                                       |
| 1 | 3.86E-02 | AMY1C        | NM_001008219 | amylase, alpha 1C%3B salivary                                                              |
| 1 | 3.86E-02 | LOC653820    | XM_935477    | similar to family with sequence similarity 72, member A                                    |
| 1 | 3.86E-02 | LOC644323    | XM_927488    | hypothetical protein LOC644323                                                             |
| 1 | 3.86E-02 | LOC644312    | XM_927481    | similar to SLIT-ROBO Rho GTPase-activating protein 2 (srGAP2) (Formin-binding protein 2)   |
| 1 | 3.86E-02 | PEX11B       | NM_003846    | peroxisomal biogenesis factor 11B                                                          |
| 1 | 3.86E-02 | ZNF364       | BC064903     | zinc finger protein 364                                                                    |
| 1 | 3.86E-02 | POLR3C       | BC004424     | polymerase (RNA) III (DNA directed) polypeptide C (62kD)                                   |
| 1 | 3.86E-02 | SF3B4        | BC090883     | splicing factor 3b, subunit 4, 49kDa                                                       |
| 1 | 3.86E-02 | S100A10      | NM_002966    | S100 calcium binding protein A10 (annexin II ligand, calpactin I, light polypeptide (p11)) |
| 1 | 3.86E-02 | MOSC2        | AL136931     | MOCO sulphurase C-terminal domain containing 2                                             |
| 1 | 3.86E-02 | NT5C1A       | AY028778     | 5'-nucleotidase, cytosolic IA                                                              |
| 1 | 3.86E-02 | LOC126661    | XM_934307    | hypothetical protein LOC126661                                                             |
| 1 | 3.86E-02 | MAGOH        | BC018211     | mago-nashi homolog, proliferation-associated (Drosophila)                                  |
| 1 | 3.86E-02 | TMEM48       | AL354613     | transmembrane protein 48                                                                   |
| 1 | 3.86E-02 | ENO1         | BC073991     | enolase 1, (alpha)                                                                         |
| 1 | 4.05E-02 | SLAMF8       | AF146761     | SLAM family member 8                                                                       |
| 1 | 4.27E-02 | PHGDH        | AK093306     | phosphoglycerate dehydrogenase                                                             |
| 1 | 4.27E-02 | TMEM51       | BC000202     | transmembrane protein 51                                                                   |
| 1 | 4.27E-02 | DEDD         | NM_001039711 | death effector domain containing                                                           |
| 1 | 4.40E-02 | C1orf121     | NM_016076    | chromosome 1 open reading frame 121                                                        |
| 1 | 4.85E-02 | FLJ21272     | AK024925     | hypothetical protein FLJ21272                                                              |
| 1 | 4.85E-02 | LOC642516    | XM_926501    | similar to profilin 1                                                                      |
| 1 | 4.85E-02 | S100A6       | NM_014624    | S100 calcium binding protein A6 (calyculin)                                                |
| 1 | 4.85E-02 | MTX1         | CR605982     | metaxin 1                                                                                  |
| 1 | 4.85E-02 | THBS3        | NM_007112    | thrombospondin 3                                                                           |
| 1 | 4.85E-02 | LOC126860    | XM_929969    | similar to Centaurin-gamma 2                                                               |
| 1 | 4.85E-02 | TDRD5        | NM_173533    | tudor domain containing 5                                                                  |
| 1 | 4.85E-02 | RP11-34P13.4 | AF346307     | F379 retina-specific protein                                                               |
| 1 | 4.85E-02 | LOC645520    | XM_935059    | F379 retina-specific protein                                                               |
| 1 | 4.85E-02 | COL9A2       | NM_001852    | collagen, type IX, alpha 2                                                                 |
| 1 | 4.85E-02 | PTPRF        | NM_130440    | protein tyrosine phosphatase, receptor type, F                                             |
| 1 | 4.91E-02 | NOTCH2       | NM_024408    | Notch homolog 2 (Drosophila)                                                               |
| 1 | 4.91E-02 | HAX1         | BC015209     | HCLS1 associated protein X-1                                                               |
| 1 | 4.91E-02 | CDC2L2       | BC110905     | cell division cycle 2-like 2 (PITSLRE proteins)                                            |
| 1 | 4.91E-02 | C1orf186     | NM_001007544 | chromosome 1 open reading frame 186                                                        |
| 1 | 4.91E-02 | LOC642299    | XM_930677    | hypothetical protein LOC642299                                                             |
| 1 | 4.91E-02 | DEGS1        | NM_003676    | degenerative spermatocyte homolog 1, lipid desaturase (Drosophila)                         |
| 1 | 4.91E-02 | C1orf201     | BC040212     | chromosome 1 open reading frame 201                                                        |
| 1 | 4.91E-02 | NPAL3        | BC001265     | NIPA-like domain containing 3                                                              |
| 1 | 4.94E-02 | OLFML3       | NM_020190    | olfactomedin-like 3                                                                        |
| 1 | 4.94E-02 | LOC643556    | XM_933615    | similar to Aurora kinase A-interacting protein (AURKA-interacting protein)                 |
| 1 | 4.94E-02 | AURKAIP1     | BC062333     | aurora kinase A interacting protein 1                                                      |
| 1 | 4.94E-02 | NBPF20       | NM_001037675 | neuroblastoma breakpoint family, member 20                                                 |
| 1 | 4.94E-02 | C1orf152     | XM_927814    | chromosome 1 open reading frame 152                                                        |
| 1 | 4.94E-02 | LOC644034    | XM_929658    | similar to profilin 1                                                                      |
| 1 | 4.94E-02 | LOC645116    | XM_932650    | hypothetical protein LOC645116                                                             |
| 1 | 4.94E-02 | GON4L        | NM_032292    | gon-4-like (C.elegans)                                                                     |
| 1 | 4.94E-02 | SYT11        | BC039205     | synaptotagmin XI                                                                           |

|   |          |           |                |                                                                                   |
|---|----------|-----------|----------------|-----------------------------------------------------------------------------------|
| 1 | 4.94E-02 | KIAA0907  | AY112682       | KIAA0907                                                                          |
| 1 | 4.94E-02 | ATP1A4    | NM_001001734   | ATPase, Na <sup>+</sup> /K <sup>+</sup> transporting, alpha 4 polypeptide         |
| 1 | 4.94E-02 | VAMP4     | BC005974       | vesicle-associated membrane protein 4                                             |
| 1 | 4.94E-02 | LAX1      | BC069650       | lymphocyte transmembrane adaptor 1                                                |
| 1 | 4.94E-02 | NUAK2     | NM_030952      | NUAK family, SNF1-like kinase, 2                                                  |
| 1 | 4.94E-02 | PROX1     | BC024201       | prospero-related homeobox 1                                                       |
| 1 | 4.94E-02 | LYPLAL1   | BC016711       | lysophospholipase-like 1                                                          |
| 1 | 4.94E-02 | LOC643723 | XM_931767      | hypothetical protein LOC643723                                                    |
| 1 | 4.94E-02 | HIST3H2BB | NM_175055      | histone 3, H2bb                                                                   |
| 1 | 4.94E-02 | HIST3H2A  | BC001193       | histone 3, H2a                                                                    |
| 1 | 4.94E-02 | HEATR1    | BC062442       | HEAT repeat containing 1                                                          |
| 1 | 4.94E-02 | OR2L13    | NM_175911      | olfactory receptor, family 2, subfamily L, member 13                              |
| 1 | 4.94E-02 | FAM79A    | NM_182752      | family with sequence similarity 79, member A                                      |
| 1 | 4.94E-02 | C1orf174  | NM_207356      | chromosome 1 open reading frame 174                                               |
| 1 | 4.94E-02 | CITED4    | BC035496       | Cbp/p300-interacting transactivator, with Glu/Asp-rich carboxy-terminal domain, 4 |
| 2 | 1.00E-02 | LOC646881 | XM_934009      | hypothetical protein LOC646881                                                    |
| 2 | 1.00E-02 | ARMC9     | BC065271       | armadillo repeat containing 9                                                     |
| 2 | 1.00E-02 |           | 2-Sep BC033559 | septin 2                                                                          |
| 2 | 1.00E-02 | HDLBP     | NM_005336      | high density lipoprotein binding protein (vigilin)                                |
| 2 | 1.00E-02 | ITGB1BP1  | NM_022334      | integrin beta 1 binding protein 1                                                 |
| 2 | 1.25E-02 | STK16     | CR623144       | serine/threonine kinase 16                                                        |
| 2 | 1.25E-02 | GLB1L     | BC028370       | galactosidase, beta 1-like                                                        |
| 2 | 1.25E-02 | TUBA4     | NM_025019      | tubulin, alpha 4                                                                  |
| 2 | 1.25E-02 | MRPL44    | BC012058       | mitochondrial ribosomal protein L44                                               |
| 2 | 1.26E-02 | FOXD4L1   | NM_012184      | forkhead box D4-like 1                                                            |
| 2 | 1.36E-02 | IL1F6     | BC107042       | interleukin 1 family, member 6 (epsilon)                                          |
| 2 | 1.48E-02 | FLJ43374  | NM_198582      | FLJ43374 protein                                                                  |
| 2 | 1.63E-02 | LOC401019 | XM_376154      | similar to 40S ribosomal protein S15 (RIG protein)                                |
| 2 | 1.63E-02 | SUPT7L    | AF224759       | suppressor of Ty 7 ( <i>S. cerevisiae</i> )-like                                  |
| 2 | 1.63E-02 | SLC4A1AP  | BC099739       | solute carrier family 4 (anion exchanger), member 1, adaptor protein              |
| 2 | 1.64E-02 | MGC4268   | BC016181       | hypothetical protein MGC4268                                                      |
| 2 | 1.64E-02 | LOC646509 | XM_933667      | hypothetical protein LOC646509                                                    |
| 2 | 1.64E-02 | RHOQ      | NM_012249      | ras homolog gene family, member Q                                                 |
| 2 | 1.64E-02 | VAMP5     | NM_006634      | vesicle-associated membrane protein 5 (myobrevin)                                 |
| 2 | 1.64E-02 | FLJ20758  | NM_017952      | FLJ20758 protein                                                                  |
| 2 | 1.69E-02 | CLK1      | L29222         | CDC-like kinase 1                                                                 |
| 2 | 1.69E-02 | FLJ46536  | AK131246       | FLJ46536 protein                                                                  |
| 2 | 1.70E-02 | LOC150763 | AK131194       | hypothetical protein LOC150763                                                    |
| 2 | 1.94E-02 | CBWD1     | AF212253       | COBW domain containing 1                                                          |
| 2 | 1.94E-02 | CBWD2     | NM_172003      | COBW domain containing 2                                                          |
| 2 | 1.94E-02 | IFT172    | NM_015662      | intraflagellar transport 172 homolog ( <i>Chlamydomonas</i> )                     |
| 2 | 1.94E-02 | GCKR      | NM_001486      | glucokinase (hexokinase 4) regulator                                              |
| 2 | 1.97E-02 | ZNHIT4    | BC050666       | zinc finger, HIT type 4                                                           |
| 2 | 1.97E-02 | WBP1      | NM_012477      | WW domain binding protein 1                                                       |
| 2 | 2.02E-02 | CD8B      | NM_172213      | CD8b molecule                                                                     |
| 2 | 2.06E-02 | NAT8      | NM_003960      | N-acetyltransferase 8 (camello like)                                              |
| 2 | 2.06E-02 | LOC200420 | NM_145300      | LOC200420                                                                         |
| 2 | 2.24E-02 | HS1BP3    | NM_022460      | HS1-binding protein 3                                                             |
| 2 | 2.24E-02 | EIF4E2    | BC021226       | eukaryotic translation initiation factor 4E member 2                              |
| 2 | 2.24E-02 | TIGD1     | BC035143       | tigger transposable element derived 1                                             |
| 2 | 2.26E-02 | KCNE4     | NM_080671      | potassium voltage-gated channel, Isk-related family, member 4                     |
| 2 | 2.41E-02 | IL1RN     | NM_173843      | interleukin 1 receptor antagonist                                                 |

|   |          |              |              |                                                                                                   |
|---|----------|--------------|--------------|---------------------------------------------------------------------------------------------------|
| 2 | 2.41E-02 | PGAP1        | BX648642     | GPI deacylase                                                                                     |
| 2 | 2.41E-02 | SLC23A3      | AK055730     | solute carrier family 23 (nucleobase transporters), member 3                                      |
| 2 | 2.41E-02 | C2orf17      | NM_024293    | chromosome 2 open reading frame 17                                                                |
| 2 | 2.41E-02 | AHSA2        | NM_152392    | AHA1, activator of heat shock 90kDa protein ATPase homolog 2 (yeast)                              |
| 2 | 2.41E-02 | VAX2         | NM_012476    | ventral anterior homeobox 2                                                                       |
| 2 | 2.44E-02 | HK2          | NM_000189    | hexokinase 2                                                                                      |
| 2 | 2.89E-02 | FOSL2        | BC008899     | FOS-like antigen 2                                                                                |
| 2 | 2.92E-02 | SCLY         | BC007891     | selenocysteine lyase                                                                              |
| 2 | 2.92E-02 | EMILIN1      | BC007530     | elastin microfibril interfacier 1                                                                 |
| 2 | 2.92E-02 | LOC400948    | XM_376043    | similar to CG33774-PA                                                                             |
| 2 | 2.92E-02 | AUP1         | NM_181575    | ancient ubiquitous protein 1                                                                      |
| 2 | 2.95E-02 | DKFZp434N062 | BC064511     | hypothetical protein DKFZp434N062                                                                 |
| 2 | 2.99E-02 | EHBP1        | NM_015252    | EH domain binding protein 1                                                                       |
| 2 | 3.27E-02 | CEBPZ        | NM_005760    | CCAAT/enhancer binding protein zeta                                                               |
| 2 | 3.27E-02 | PRO1853      | NM_144736    | hypothetical protein PRO1853                                                                      |
| 2 | 3.40E-02 | RY1          | BC017890     | putative nucleic acid binding protein RY-1                                                        |
| 2 | 3.58E-02 | CENTG2       | AK001722     | centaurin, gamma 2                                                                                |
| 2 | 3.86E-02 | RPL31        | BC017343     | ribosomal protein L31                                                                             |
| 2 | 3.86E-02 | HPCAL1       | NM_002149    | hippocalcin-like 1                                                                                |
| 2 | 3.86E-02 | RND3         | NM_005168    | Rho family GTPase 3                                                                               |
| 2 | 4.27E-02 | LOC653474    | XM_927559    | similar to inhibitor of growth family, member 5                                                   |
| 2 | 4.40E-02 | MGC4677      | BC010491     | hypothetical protein MGC4677                                                                      |
| 2 | 4.85E-02 | FLJ13305     | XM_934533    | hypothetical protein FLJ13305                                                                     |
| 2 | 4.91E-02 | MTIF2        | NM_001005369 | mitochondrial translational initiation factor 2                                                   |
| 2 | 4.94E-02 | ALS2         | NM_020919    | amyotrophic lateral sclerosis 2 (juvenile)                                                        |
| 2 | 4.94E-02 | BARD1        | NM_000465    | BRCA1 associated RING domain 1                                                                    |
| 2 | 4.94E-02 | ZNF514       | BC074901     | zinc finger protein 514                                                                           |
| 3 | 1.10E-02 | NME6         | BC012828     | non-metastatic cells 6, protein expressed in (nucleoside-diphosphate kinase)                      |
| 3 | 1.25E-02 | CCR2         | BC095540     | chemokine (C-C motif) receptor 2                                                                  |
| 3 | 1.25E-02 | BAP1         | NM_004656    | BRCA1 associated protein-1 (ubiquitin carboxy-terminal hydrolase)                                 |
| 3 | 1.25E-02 | PHF7         | NM_173341    | PHD finger protein 7                                                                              |
| 3 | 1.36E-02 | LOC643052    | XM_926422    | similar to mucin 17                                                                               |
| 3 | 1.36E-02 | LOC391609    | XM_497952    | similar to mucin 17                                                                               |
| 3 | 1.36E-02 | MFI2         | NM_005929    | antigen p97 (melanoma associated) identified by monoclonal antibodies 133.2 and 96.5              |
| 3 | 1.61E-02 | MRAS         | BC047690     | muscle RAS oncogene homolog                                                                       |
| 3 | 1.63E-02 | DGKG         | NM_001346    | diacylglycerol kinase, gamma 90kDa                                                                |
| 3 | 1.64E-02 | EPHB3        | NM_004443    | EPH receptor B3                                                                                   |
| 3 | 1.69E-02 | SHQ1         | BC039830     | SHQ1 homolog ( <i>S. cerevisiae</i> )                                                             |
| 3 | 1.75E-02 | TSEN2        | AK074794     | tRNA splicing endonuclease 2 homolog ( <i>S. cerevisiae</i> )                                     |
| 3 | 1.94E-02 | RYK          | S59184       | RYK receptor-like tyrosine kinase                                                                 |
| 3 | 1.94E-02 | ZDHHC19      | BC034801     | zinc finger, DHHC-type containing 19                                                              |
| 3 | 1.94E-02 | MYL3         | BC009790     | myosin, light polypeptide 3, alkali%3B ventricular, skeletal, slow                                |
| 3 | 2.02E-02 | TEX264       | NM_015926    | testis expressed sequence 264                                                                     |
| 3 | 2.24E-02 | LOC440993    | NM_001013714 | hypothetical gene supported by AK128346                                                           |
| 3 | 2.41E-02 | ALG3         | BC002839     | asparagine-linked glycosylation 3 homolog ( <i>S. cerevisiae</i> , alpha-1,3-mannosyltransferase) |
| 3 | 2.41E-02 | MGC2408      | BC005835     | hypothetical protein MGC2408                                                                      |
| 3 | 2.41E-02 | ECE2         | NM_014693    | endothelin converting enzyme 2                                                                    |
| 3 | 2.41E-02 | ETV5         | NM_004454    | ets variant gene 5 (ets-related molecule)                                                         |
| 3 | 2.61E-02 | MGLL         | NM_001003794 | monoglyceride lipase                                                                              |
| 3 | 2.89E-02 | CPN2         | XM_925798    | carboxypeptidase N, polypeptide 2, 83kD                                                           |
| 3 | 2.92E-02 | KCNMB3       | NM_171829    | potassium large conductance calcium-activated channel, subfamily M beta member 3                  |
| 3 | 2.95E-02 | MYLK         | NM_053030    | myosin, light polypeptide kinase                                                                  |

|   |          |           |              |                                                                                          |
|---|----------|-----------|--------------|------------------------------------------------------------------------------------------|
| 3 | 3.40E-02 | SLC22A13  | NM_004256    | solute carrier family 22 (organic cation transporter), member 13                         |
| 3 | 3.58E-02 | CD47      | NM_001025080 | CD47 molecule                                                                            |
| 3 | 3.58E-02 | SETMAR    | AK222734     | SET domain and mariner transposase fusion gene                                           |
| 3 | 3.58E-02 | RIS1      | BC057390     | Ras-induced senescence 1                                                                 |
| 3 | 3.86E-02 | GPR156    | NM_153002    | G protein-coupled receptor 156                                                           |
| 3 | 3.86E-02 | KPNA4     | NM_002268    | karyopherin alpha 4 (importin alpha 3)                                                   |
| 3 | 3.86E-02 | KRT8L2    | XM_029323    | keratin 8-like 2                                                                         |
| 3 | 3.86E-02 | VILL      | NM_015873    | villin-like                                                                              |
| 3 | 3.86E-02 | CMYA1     | CR749430     | cardiomyopathy associated 1                                                              |
| 3 | 4.27E-02 | ACY1      | BC014112     | aminoacylase 1                                                                           |
| 3 | 4.27E-02 | ARF4      | BC003364     | ADP-ribosylation factor 4                                                                |
| 3 | 4.40E-02 | CX3CR1    | NM_001337    | chemokine (C-X3-C motif) receptor 1                                                      |
| 3 | 4.85E-02 | RPL32     | NM_001007074 | ribosomal protein L32                                                                    |
| 3 | 4.91E-02 | PLCXD2    | NM_153268    | phosphatidylinositol-specific phospholipase C, X domain containing 2                     |
| 3 | 4.91E-02 | CAPN7     | NM_014296    | calpain 7                                                                                |
| 3 | 4.94E-02 | GPR128    | NM_032787    | G protein-coupled receptor 128                                                           |
| 3 | 4.94E-02 | SLC6A6    | NM_003043    | solute carrier family 6 (neurotransmitter transporter, taurine), member 6                |
| 3 | 4.94E-02 | SHOX2     | NM_003030    | short stature homeobox 2                                                                 |
| 3 | 4.94E-02 | FYTTD1    | BC035006     | forty-two-three domain containing 1                                                      |
| 3 | 4.94E-02 | MYD88     | NM_002468    | myeloid differentiation primary response gene (88)                                       |
| 3 | 4.94E-02 | ACAA1     | BC000635     | acetyl-Coenzyme A acyltransferase 1 (peroxisomal 3-oxoacyl-Coenzyme A thiolase)          |
| 3 | 4.94E-02 | XYLB      | NM_005108    | xylulokinase homolog (H. influenzae)                                                     |
| 3 | 4.94E-02 | ABHD6     | NM_020676    | abhydrolase domain containing 6                                                          |
| 4 | 1.00E-02 | PPP2R2C   | NM_020416    | protein phosphatase 2 (formerly 2A), regulatory subunit B (PR 52), gamma isoform         |
| 4 | 1.00E-02 | LOC643513 | XM_926829    | similar to Importin alpha-2 subunit (Karyopherin alpha-2 subunit) (SRP1-alpha)           |
| 4 | 1.00E-02 | LOC643518 | XM_926832    | similar to Importin alpha-2 subunit (Karyopherin alpha-2 subunit) (SRP1-alpha)           |
| 4 | 1.05E-02 | LOC653442 | XM_377830    | similar to deubiquitinating enzyme 3                                                     |
| 4 | 1.05E-02 | LOC653445 | XM_377831    | similar to deubiquitinating enzyme 3                                                     |
| 4 | 1.10E-02 | MXD4      | BC002713     | MAX dimerization protein 4                                                               |
| 4 | 1.25E-02 | LOC653541 | XM_927996    | similar to double homeobox 4c                                                            |
| 4 | 1.25E-02 | PIGG      | BC110878     | phosphatidylinositol glycan, class G                                                     |
| 4 | 1.25E-02 | ZNF721    | NM_133474    | zinc finger protein 721                                                                  |
| 4 | 1.36E-02 | LRPAP1    | BC112067     | low density lipoprotein receptor-related protein associated protein 1                    |
| 4 | 1.36E-02 | LOC653459 | XM_377834    | similar to deubiquitinating enzyme 3                                                     |
| 4 | 1.48E-02 | FLJ35816  | NM_001039067 | FLJ35816 protein                                                                         |
| 4 | 2.26E-02 | ZNF595    | BC036110     | zinc finger protein 595                                                                  |
| 4 | 2.26E-02 | ZNF718    | NM_001039127 | zinc finger protein 718                                                                  |
| 4 | 2.41E-02 | PCDH10    | NM_020815    | protocadherin 10                                                                         |
| 4 | 2.41E-02 | LOC646222 | XM_933472    | hypothetical protein LOC646222                                                           |
| 4 | 2.41E-02 | MYL5      | AK123974     | myosin, light polypeptide 5, regulatory                                                  |
| 4 | 2.41E-02 | ATP5I     | BC003679     | ATP synthase, H+ transporting, mitochondrial F0 complex, subunit E                       |
| 4 | 2.41E-02 | MRFAP1L1  | BC008087     | Morf4 family associated protein 1-like 1                                                 |
| 4 | 2.41E-02 | AFAP      | AK127962     | actin filament associated protein                                                        |
| 4 | 2.41E-02 | PRDM8     | NM_020226    | PR domain containing 8                                                                   |
| 4 | 2.41E-02 | HNRPD     | BC002401     | heterogeneous nuclear ribonucleoprotein D (AU-rich element RNA binding protein 1, 37kDa) |
| 4 | 2.89E-02 | PAICS     | BC019255     | phosphoribosylaminoimidazole carboxylase,                                                |
| 4 | 2.89E-02 | PPAT      | NM_002703    | phosphoribosyl pyrophosphate amidotransferase                                            |
| 4 | 2.92E-02 | PLRG1     | BC106004     | pleiotropic regulator 1 (PRL1 homolog, Arabidopsis)                                      |
| 4 | 2.99E-02 | ZFYVE28   | NM_020972    | zinc finger, FYVE domain containing 28                                                   |
| 4 | 2.99E-02 | ZNF141    | BC074853     | zinc finger protein 141 (clone pHZ-44)                                                   |
| 4 | 2.99E-02 | LOC642645 | XM_930973    | hypothetical protein LOC642645                                                           |
| 4 | 3.01E-02 | NAPIL5    | NM_153757    | nucleosome assembly protein 1-like 5                                                     |



|   |          |           |              |                                                                                                 |
|---|----------|-----------|--------------|-------------------------------------------------------------------------------------------------|
| 4 | 3.27E-02 | S100P     | NM_005980    | S100 calcium binding protein P                                                                  |
| 4 | 3.35E-02 | LEF1      | NM_016269    | lymphoid enhancer-binding factor 1                                                              |
| 4 | 3.35E-02 | FLJ34443  | NM_175918    | hypothetical protein FLJ34443                                                                   |
| 4 | 4.27E-02 | LOC441046 | BC025996     | hypothetical LOC 441046                                                                         |
| 4 | 4.40E-02 | WHSC1     | NM_133334    | Wolf-Hirschhorn syndrome candidate 1                                                            |
| 4 | 4.85E-02 | PCGF3     | BC107061     | polycomb group ring finger 3                                                                    |
| 4 | 4.85E-02 | HPSE      | BC051321     | heparanase                                                                                      |
| 4 | 4.94E-02 | PPP3CA    | NM_000944    | protein phosphatase 3 (formerly 2B), catalytic subunit, alpha isoform (calcineurin A alpha)     |
| 4 | 4.94E-02 | SC4MOL    | BC107879     | sterol-C4-methyl oxidase-like                                                                   |
| 4 | 4.94E-02 | SLA/LP    | BX648976     | soluble liver antigen/liver pancreas antigen                                                    |
| 4 | 4.94E-02 | UGDH      | BC022781     | UDP-glucose dehydrogenase                                                                       |
| 4 | 4.94E-02 | APBB2     | NM_173075    | amyloid beta (A4) precursor protein-binding, family B, member 2 (Fe65-like)                     |
| 4 | 4.94E-02 | TMEM128   | BC091482     | transmembrane protein 128                                                                       |
| 4 | 4.94E-02 | REST      | NM_005612    | RE1-silencing transcription factor                                                              |
| 5 | 1.21E-02 | HMGCR     | BC033692     | 3-hydroxy-3-methylglutaryl-Coenzyme A reductase                                                 |
| 5 | 1.25E-02 | P4HA2     | NM_001017974 | procollagen-proline, 2-oxoglutarate 4-dioxygenase (proline 4-hydroxylase), alpha polypeptide II |
| 5 | 1.25E-02 | RGS14     | AK123382     | regulator of G-protein signalling 14                                                            |
| 5 | 1.25E-02 | LMAN2     | BC017263     | lectin, mannose-binding 2                                                                       |
| 5 | 1.26E-02 | ZFR       | NM_016107    | zinc finger RNA binding protein                                                                 |
| 5 | 1.64E-02 | LOC646040 | XM_933354    | hypothetical protein LOC646040                                                                  |
| 5 | 1.64E-02 | SQSTM1    | NM_003900    | sequestosome 1                                                                                  |
| 5 | 1.69E-02 | OR2V2     | NM_206880    | olfactory receptor, family 2, subfamily V, member 2                                             |
| 5 | 1.69E-02 | SMN1      | NM_000344    | survival of motor neuron 1, telomeric                                                           |
| 5 | 1.69E-02 | SMN2      | BC070242     | survival of motor neuron 2, centromeric                                                         |
| 5 | 1.94E-02 | mimitin   | NM_174889    | Myc-induced mitochondria protein                                                                |
| 5 | 1.94E-02 | ERCC8     | NM_000082    | excision repair cross-complementing rodent repair deficiency, complementation group 8           |
| 5 | 2.24E-02 | SLC45A2   | NM_001012509 | solute carrier family 45, member 2                                                              |
| 5 | 2.41E-02 | YTHDC2    | NM_022828    | YTH domain containing 2                                                                         |
| 5 | 2.41E-02 | SKP2      | BC001441     | S-phase kinase-associated protein 2 (p45)                                                       |
| 5 | 2.41E-02 | LMBRD2    | NM_001007527 | LMBR1 domain containing 2                                                                       |
| 5 | 2.41E-02 | FBXO4     | NM_033484    | F-box protein 4                                                                                 |
| 5 | 2.61E-02 | ARL10     | BC059361     | ADP-ribosylation factor-like 10                                                                 |
| 5 | 2.61E-02 | KIAA1191  | AL390217     | KIAA1191                                                                                        |
| 5 | 2.89E-02 | SH3RF2    | BC073914     | SH3 domain containing ring finger 2                                                             |
| 5 | 2.89E-02 | FLJ36951  | XM_932348    | similar to eukaryotic translation initiation factor 4e 1a                                       |
| 5 | 2.89E-02 | KENAE     | AB024691     | Kenae                                                                                           |
| 5 | 2.89E-02 | LOC653412 | XM_927305    | similar to hypothetical protein LOC153561                                                       |
| 5 | 2.92E-02 | ZNF300    | NM_052860    | zinc finger protein 300                                                                         |
| 5 | 2.95E-02 | CAMLG     | NM_001745    | calcium modulating ligand                                                                       |
| 5 | 2.95E-02 | FGF1      | BC032697     | fibroblast growth factor 1 (acidic)                                                             |
| 5 | 3.27E-02 | TRIP13    | BC019294     | thyroid hormone receptor interactor 13                                                          |
| 5 | 3.27E-02 | BRD9      | NM_023924    | bromodomain containing 9                                                                        |
| 5 | 3.58E-02 | CLK4      | NM_020666    | CDC-like kinase 4                                                                               |
| 5 | 3.86E-02 | TNFAIP8   | AK001931     | tumor necrosis factor, alpha-induced protein 8                                                  |
| 5 | 3.86E-02 | ORF1-FL49 | BC023982     | putative nuclear protein ORF1-FL49                                                              |
| 5 | 3.86E-02 | NOLA2     | BC000009     | nucleolar protein family A, member 2 (H/ACA small nucleolar RNPs)                               |
| 5 | 3.86E-02 | GLRX      | BC010965     | glutaredoxin (thioltransferase)                                                                 |
| 5 | 4.27E-02 | GNB2L1    | AY336089     | guanine nucleotide binding protein (G protein), beta polypeptide 2-like 1                       |
| 5 | 4.85E-02 | HDAC3     | AF005482     | histone deacetylase 3                                                                           |
| 5 | 4.85E-02 | C5orf16   | NM_173828    | chromosome 5 open reading frame 16                                                              |
| 5 | 4.85E-02 | IL12B     | NM_002187    | interleukin 12B (natural killer cell stimulatory factor 2)                                      |
| 5 | 4.85E-02 | SLC34A1   | BC053349     | solute carrier family 34 (sodium phosphate), member 1                                           |

|   |          |              |              |                                                                                           |
|---|----------|--------------|--------------|-------------------------------------------------------------------------------------------|
| 5 | 4.91E-02 | LOC643935    | XM_927193    | similar to nuclear pore membrane protein 121                                              |
| 5 | 4.94E-02 | PCDH1        | BC051287     | protocadherin 1 (cadherin-like 1)                                                         |
| 5 | 4.94E-02 | FBXW11       | NM_012300    | F-box and WD-40 domain protein 11                                                         |
| 6 | 1.00E-02 | NFKBIL1      | NM_005007    | nuclear factor of kappa light polypeptide gene enhancer in B-cells inhibitor-like 1       |
| 6 | 1.00E-02 | ATP6V1G2     | NM_130463    | ATPase, H+ transporting, lysosomal 13kDa, V1 subunit G2                                   |
| 6 | 1.00E-02 | BAT1         | NM_080598    | HLA-B associated transcript 1                                                             |
| 6 | 1.25E-02 | MAP3K4       | AF116604     | mitogen-activated protein kinase kinase kinase 4                                          |
| 6 | 1.25E-02 | TTBK1        | AK131217     | tau tubulin kinase 1                                                                      |
| 6 | 1.32E-02 | MICAL1       | NM_022765    | microtubule associated monooxygenase, calponin and LIM domain containing 1                |
| 6 | 1.48E-02 | SYNGAP1      | NM_006772    | synaptic Ras GTPase activating protein 1 homolog (rat)                                    |
| 6 | 1.48E-02 | PARC         | CR749841     | p53-associated parkin-like cytoplasmic protein                                            |
| 6 | 1.61E-02 | RAET1G       | NM_001001788 | retinoic acid early transcript 1G                                                         |
| 6 | 1.61E-02 | KCNK5        | BC060793     | potassium channel, subfamily K, member 5                                                  |
| 6 | 1.63E-02 | CPNE5        | BC053872     | copine V                                                                                  |
| 6 | 1.63E-02 | UBR2         | NM_015255    | ubiquitin protein ligase E3 component n-recognin 2                                        |
| 6 | 1.64E-02 | CLIC5        | BC035968     | chloride intracellular channel 5                                                          |
| 6 | 1.69E-02 | RAET1L       | NM_130900    | retinoic acid early transcript 1L                                                         |
| 6 | 1.70E-02 | SART2        | BC039245     | squamous cell carcinoma antigen recognized by T cells 2                                   |
| 6 | 1.70E-02 | TSPYL1       | AK096882     | TSPY-like 1                                                                               |
| 6 | 1.70E-02 | WDR46        | BC000388     | WD repeat domain 46                                                                       |
| 6 | 1.70E-02 | PFDN6        | NM_014260    | prefoldin subunit 6                                                                       |
| 6 | 1.94E-02 | LY6G5C       | NM_001002849 | lymphocyte antigen 6 complex, locus G5C                                                   |
| 6 | 1.94E-02 | APOBEC2      | NM_006789    | apolipoprotein B mRNA editing enzyme, catalytic polypeptide-like 2                        |
| 6 | 2.24E-02 | TNFAIP3      | NM_006290    | tumor necrosis factor, alpha-induced protein 3                                            |
| 6 | 2.41E-02 | MTRFIL       | NM_019041    | mitochondrial translational release factor 1-like                                         |
| 6 | 2.41E-02 | HSD17B8      | NM_014234    | hydroxysteroid (17-beta) dehydrogenase 8                                                  |
| 6 | 2.41E-02 | RING1        | NM_002931    | ring finger protein 1                                                                     |
| 6 | 2.44E-02 | HCG9         | NM_005844    | HLA complex group 9                                                                       |
| 6 | 2.89E-02 | C6orf60      | BX640728     | chromosome 6 open reading frame 60                                                        |
| 6 | 2.92E-02 | GRIK2        | BC063814     | glutamate receptor, ionotropic, kainate 2                                                 |
| 6 | 2.95E-02 | PREP         | NM_002726    | prolyl endopeptidase                                                                      |
| 6 | 2.95E-02 | RP5-875H10.1 | NM_001030060 | SAM domain containing 1                                                                   |
| 6 | 2.95E-02 | PPP1R14C     | BC015773     | protein phosphatase 1, regulatory (inhibitor) subunit 14C                                 |
| 6 | 2.95E-02 | AGER         | AB061669     | advanced glycosylation end product-specific receptor                                      |
| 6 | 2.95E-02 | KLHDC3       | BC012987     | kelch domain containing 3                                                                 |
| 6 | 2.95E-02 | CAPN11       | NM_007058    | calpain 11                                                                                |
| 6 | 3.27E-02 | PSMB8        | NM_004159    | proteasome (prosome, macropain) subunit, beta type, 8 (large multifunctional peptidase 7) |
| 6 | 3.40E-02 | GTPBP2       | NM_019096    | GTP binding protein 2                                                                     |
| 6 | 3.40E-02 | MAD2L1BP     | NM_001003690 | MAD2L1 binding protein                                                                    |
| 6 | 3.58E-02 | FOXO3A       | AF041336     | forkhead box O3A                                                                          |
| 6 | 3.58E-02 | NCOA7        | BC071782     | nuclear receptor coactivator 7                                                            |
| 6 | 3.58E-02 | LOC645793    | XM_371850    | similar to CaLPain family member (clp-2)                                                  |
| 6 | 3.58E-02 | C6orf103     | AK097570     | chromosome 6 open reading frame 103                                                       |
| 6 | 3.58E-02 | TBP          | BC109053     | TATA box binding protein                                                                  |
| 6 | 3.58E-02 | PSMB1        | NM_002793    | proteasome (prosome, macropain) subunit, beta type, 1                                     |
| 6 | 3.58E-02 | CUL7         | BC033647     | cullin 7                                                                                  |
| 6 | 3.58E-02 | KLC4         | NM_201521    | kinesin light chain 4                                                                     |
| 6 | 3.58E-02 | TTK          | BC032858     | TTK protein kinase                                                                        |
| 6 | 3.86E-02 | DDO          | BC032786     | D-aspartate oxidase                                                                       |
| 6 | 3.86E-02 | EPB41L2      | AL050384     | erythrocyte membrane protein band 4.1-like 2                                              |
| 6 | 3.86E-02 | C6orf114     | BC066553     | chromosome 6 open reading frame 114                                                       |
| 6 | 3.86E-02 | HIST1H1A     | BC069492     | histone 1, H1a                                                                            |

|   |          |           |              |                                                                |
|---|----------|-----------|--------------|----------------------------------------------------------------|
| 6 | 3.86E-02 | HIST1H3A  | BC069303     | histone 1, H3a                                                 |
| 6 | 3.86E-02 | HIST1H4A  | BC069654     | histone 1, H4a                                                 |
| 6 | 3.86E-02 | HIST1H2BL | NM_003519    | histone 1, H2bl                                                |
| 6 | 3.86E-02 | HIST1H2AI | BC112254     | histone 1, H2ai                                                |
| 6 | 3.86E-02 | HIST1H3H  | BC007518     | histone 1, H3h                                                 |
| 6 | 3.86E-02 | GPSM3     | NM_022107    | G-protein signalling modulator 3 (AGS3-like, C. elegans)       |
| 6 | 3.86E-02 | HLA-DQB1  | M20432       | major histocompatibility complex, class II, DQ beta 1          |
| 6 | 3.86E-02 | SNRPC     | NM_003093    | small nuclear ribonucleoprotein polypeptide C                  |
| 6 | 3.86E-02 | MRPL2     | NM_015950    | mitochondrial ribosomal protein L2                             |
| 6 | 3.86E-02 | COL12A1   | NM_080645    | collagen, type XII, alpha 1                                    |
| 6 | 4.05E-02 | OPN5      | NM_181744    | opsin 5                                                        |
| 6 | 4.27E-02 | ABCF1     | NM_001025091 | ATP-binding cassette, sub-family F (GCN20), member 1           |
| 6 | 4.27E-02 | PNPLA1    | NM_173676    | patatin-like phospholipase domain containing 1                 |
| 6 | 4.27E-02 | ETV7      | AF147782     | ets variant gene 7 (TEL2 oncogene)                             |
| 6 | 4.27E-02 | FRS3      | NM_006653    | fibroblast growth factor receptor substrate 3                  |
| 6 | 4.27E-02 | C6orf49   | BC015975     | chromosome 6 open reading frame 49                             |
| 6 | 4.27E-02 | ABCC10    | NM_033450    | ATP-binding cassette, sub-family C (CFTR/MRP), member 10       |
| 6 | 4.85E-02 | CDKN1A    | NM_000389    | cyclin-dependent kinase inhibitor 1A (p21, Cip1)               |
| 6 | 4.85E-02 | TBN       | NM_138572    | taube nuss homolog (mouse)                                     |
| 6 | 4.91E-02 | C6orf48   | BC000706     | chromosome 6 open reading frame 48                             |
| 6 | 4.94E-02 | SGK       | NM_005627    | serum/glucocorticoid regulated kinase                          |
| 6 | 4.94E-02 | MAP7      | NM_003980    | microtubule-associated protein 7                               |
| 6 | 4.94E-02 | PCMT1     | BC007501     | protein-L-isoaspartate (D-aspartate) O-methyltransferase       |
| 6 | 4.94E-02 | NUP43     | NM_024647    | nucleoporin 43kDa                                              |
| 6 | 4.94E-02 | COL11A2   | NM_080679    | collagen, type XI, alpha 2                                     |
| 6 | 4.94E-02 | DAXX      | NM_001350    | death-associated protein 6                                     |
| 6 | 4.94E-02 | SPDEF     | NM_012391    | SAM pointed domain containing ets transcription factor         |
| 6 | 4.94E-02 | RDS       | BC074720     | retinal degeneration, slow                                     |
| 7 | 1.21E-02 | LOC653722 | XM_934915    | similar to actin-related protein 3-beta                        |
| 7 | 1.21E-02 | C7orf29   | NM_138434    | chromosome 7 open reading frame 29                             |
| 7 | 1.21E-02 | CSG1cA-T  | NM_019015    | chondroitin sulfate glucuronyltransferase                      |
| 7 | 1.21E-02 | ABCF2     | NM_005692    | ATP-binding cassette, sub-family F (GCN20), member 2           |
| 7 | 1.25E-02 | FLJ14803  | AK027678     | hypothetical protein FLJ14803                                  |
| 7 | 1.25E-02 | LOC136263 | BC017587     | LOC136263                                                      |
| 7 | 1.25E-02 | BUD31     | BC022821     | BUD31 homolog (yeast)                                          |
| 7 | 1.25E-02 | PDAP1     | NM_014891    | PDGFA associated protein 1                                     |
| 7 | 1.36E-02 | MCM7      | NM_005916    | MCM7 minichromosome maintenance deficient 7 (S. cerevisiae)    |
| 7 | 1.36E-02 | AP4M1     | CR625474     | adaptor-related protein complex 4, mu 1 subunit                |
| 7 | 1.48E-02 | LOC441268 | NM_001013725 | hypothetical gene supported by BC044942                        |
| 7 | 1.56E-02 | TRGV9     | BC072396     | T cell receptor gamma variable 9                               |
| 7 | 1.56E-02 | WIPI2     | NM_001033520 | WD repeat domain, phosphoinositide interacting 2               |
| 7 | 1.63E-02 | SLC29A4   | AK075422     | solute carrier family 29 (nucleoside transporters), member 4   |
| 7 | 1.63E-02 | GTF2IRD2  | NM_173537    | GTF2I repeat domain containing 2                               |
| 7 | 1.63E-02 | GTF2IRD2B | AY312851     | GTF2IRD2 beta                                                  |
| 7 | 1.63E-02 | LOC645215 | XM_928257    | hypothetical protein LOC645215                                 |
| 7 | 1.63E-02 | GAL3ST4   | BC012976     | galactose-3-O-sulfotransferase 4                               |
| 7 | 1.64E-02 | ARPC1B    | NM_005720    | actin related protein 2/3 complex, subunit 1B, 41kDa           |
| 7 | 1.94E-02 | LOC653629 | XM_930439    | similar to Williams Beuren syndrome chromosome region 19       |
| 7 | 1.94E-02 | MGC119295 | BC100973     | similar to Williams-Beuren syndrome critical region protein 19 |
| 7 | 1.94E-02 | HLXB9     | NM_005515    | homeobox HB9                                                   |
| 7 | 2.24E-02 | MGC2463   | BC107873     | hypothetical protein LOC79037                                  |
| 7 | 2.26E-02 | VIPR2     | NM_003382    | vasoactive intestinal peptide receptor 2                       |

|   |          |               |              |                                                                                               |
|---|----------|---------------|--------------|-----------------------------------------------------------------------------------------------|
| 7 | 2.34E-02 | FLJ45340      | NM_001039682 | hypothetical gene supported by AK127273                                                       |
| 7 | 2.41E-02 | DKFZp76112123 | NM_174929    | hypothetical protein DKFZp76112123                                                            |
| 7 | 2.41E-02 | tcag7.1017    | BC056606     | similar to Williams Beuren syndrome chromosome region 19                                      |
| 7 | 2.44E-02 | EZH2          | NM_152998    | enhancer of zeste homolog 2 (Drosophila)                                                      |
| 7 | 2.61E-02 | OR2F2         | NM_001004685 | olfactory receptor, family 2, subfamily F, member 2                                           |
| 7 | 2.61E-02 | GBAS          | BC030821     | glioblastoma amplified sequence                                                               |
| 7 | 2.61E-02 | LOC221955     | NM_139179    | KCCR13L                                                                                       |
| 7 | 2.95E-02 | LOC286016     | BC053624     | hypothetical protein LOC286016                                                                |
| 7 | 2.95E-02 | TNPO3         | NM_012470    | transportin 3                                                                                 |
| 7 | 2.95E-02 | HOXA13        | BC075791     | homeobox A13                                                                                  |
| 7 | 2.95E-02 | LOC441251     | NM_001034844 | similar to Williams Beuren syndrome chromosome region 19                                      |
| 7 | 2.95E-02 | LOC645004     | XM_932577    | hypothetical protein LOC645004                                                                |
| 7 | 2.95E-02 | TAF6          | BC018115     | TAF6 RNA polymerase II, TATA box binding protein (TBP)-associated factor, 80kDa               |
| 7 | 2.95E-02 | MGC40499      | NM_152755    | PRotein Associated with Tlr4                                                                  |
| 7 | 3.27E-02 | C7orf26       | BC005121     | chromosome 7 open reading frame 26                                                            |
| 7 | 3.40E-02 | NDUFB2        | NM_004546    | NADH dehydrogenase (ubiquinone) 1 beta subcomplex, 2, 8kDa                                    |
| 7 | 3.40E-02 | OR2A7         | NM_001005328 | olfactory receptor, family 2, subfamily A, member 7                                           |
| 7 | 3.58E-02 | NSUN5C        | NM_149379    | NOL1/NOP2/Sun domain family, member 5C                                                        |
| 7 | 3.58E-02 | NSUN5B        | BC093978     | NOL1/NOP2/Sun domain family, member 5B                                                        |
| 7 | 3.64E-02 | ZNF398        | NM_020781    | zinc finger protein 398                                                                       |
| 7 | 3.64E-02 | ZNF425        | NM_001001661 | zinc finger protein 425                                                                       |
| 7 | 3.86E-02 | ARHGEF5       | CR749203     | Rho guanine nucleotide exchange factor (GEF) 5                                                |
| 7 | 3.86E-02 | OR2A20P       | BC016940     | olfactory receptor, family 2, subfamily A, member 20 pseudogene                               |
| 7 | 3.86E-02 | LOC401357     | AK125790     | hypothetical LOC401357                                                                        |
| 7 | 3.86E-02 | PMS2CL        | CR749616     | PMS2-C terminal-like                                                                          |
| 7 | 3.86E-02 | BCL7B         | NM_001707    | B-cell CLL/lymphoma 7B                                                                        |
| 7 | 3.86E-02 | STAG3         | NM_012447    | stromal antigen 3                                                                             |
| 7 | 4.85E-02 | LOC643957     | XM_933737    | similar to NOL1/NOP2/Sun domain family, member 5 isoform 1                                    |
| 7 | 4.91E-02 | SERPINE1      | NM_000602    | serpin peptidase inhibitor, clade E (nexin, plasminogen activator inhibitor type 1), member 1 |
| 7 | 4.91E-02 | WBSCR19       | NM_175064    | Williams Beuren syndrome chromosome region 19                                                 |
| 7 | 4.91E-02 | TRIM73        | BC033812     | tripartite motif-containing 73                                                                |
| 7 | 4.91E-02 | LOC541473     | BC022013     | FKBP6-like                                                                                    |
| 7 | 4.91E-02 | ASNS          | NM_183356    | asparagine synthetase                                                                         |
| 7 | 4.91E-02 | ZNF38         | BC047309     | zinc finger protein 38                                                                        |
| 7 | 4.94E-02 | INSIG1        | NM_198337    | insulin induced gene 1                                                                        |
| 7 | 4.94E-02 | MEOX2         | BC017021     | mesenchyme homeobox 2                                                                         |
| 7 | 4.94E-02 | ECOP          | NM_030796    | EGFR-coamplified and overexpressed protein                                                    |
| 7 | 4.94E-02 | LOC653312     | XM_499317    | similar to similar to Williams Beuren syndrome chromosome region 19                           |
| 7 | 4.94E-02 | POM121        | NM_172020    | POM121 membrane glycoprotein (rat)                                                            |
| 8 | 1.03E-02 | PAG1          | BC112159     | phosphoprotein associated with glycosphingolipid microdomains 1                               |
| 8 | 1.13E-02 | LOC645651     | XM_928665    | hypothetical protein LOC645651                                                                |
| 8 | 1.13E-02 | LOC645649     | XM_928663    | hypothetical protein LOC645649                                                                |
| 8 | 1.13E-02 | PICG6         | XM_928658    | similar to olfactory receptor 873                                                             |
| 8 | 1.25E-02 | KCNS2         | BC034778     | potassium voltage-gated channel, delayed-rectifier, subfamily S, member 2                     |
| 8 | 1.32E-02 | LOC653618     | XM_928428    | similar to hypothetical protein LOC349196                                                     |
| 8 | 1.36E-02 | LOC653726     | XM_929235    | similar to family with sequence similarity 86, member B1                                      |
| 8 | 1.46E-02 | FAM90A4       | XM_496945    | family with sequence similarity 90, member A4                                                 |
| 8 | 1.56E-02 | SLC45A4       | XM_933796    | solute carrier family 45, member 4                                                            |
| 8 | 1.63E-02 | TMEM75        | NM_001037234 | transmembrane protein 75                                                                      |
| 8 | 1.64E-02 | MTFR1         | NM_014637    | mitochondrial fission regulator 1                                                             |
| 8 | 1.94E-02 | BLK           | NM_001715    | B lymphoid tyrosine kinase                                                                    |
| 8 | 1.94E-02 | RECQL4        | NM_004260    | RecQ protein-like 4                                                                           |

|   |          |           |              |                                                                                            |
|---|----------|-----------|--------------|--------------------------------------------------------------------------------------------|
| 8 | 1.94E-02 | FBXO16    | NM_172366    | F-box protein 16                                                                           |
| 8 | 1.94E-02 | FZD3      | NM_017412    | frizzled homolog 3 (Drosophila)                                                            |
| 8 | 2.24E-02 | C8orf36   | BC032797     | chromosome 8 open reading frame 36                                                         |
| 8 | 2.24E-02 | KIAA0196  | NM_014846    | KIAA0196                                                                                   |
| 8 | 2.24E-02 | LOC645378 | XM_928418    | hypothetical protein LOC645378                                                             |
| 8 | 2.41E-02 | EIF2C2    | NM_012154    | eukaryotic translation initiation factor 2C, 2                                             |
| 8 | 2.41E-02 | GPA1      | BC004129     | glycosylphosphatidylinositol anchor attachment protein 1 homolog (yeast)                   |
| 8 | 2.41E-02 | BRF2      | BC010648     | BRF2, subunit of RNA polymerase III transcription initiation factor, BRF1-like             |
| 8 | 2.41E-02 | SGK3      | NM_013257    | serum/glucocorticoid regulated kinase family, member 3                                     |
| 8 | 2.44E-02 | TRIB1     | NM_025195    | tribbles homolog 1 (Drosophila)                                                            |
| 8 | 2.44E-02 | SIAHBP1   | BC011979     | fuse-binding protein-interacting repressor                                                 |
| 8 | 2.44E-02 | MAF1      | NM_032272    | MAF1 homolog (S. cerevisiae)                                                               |
| 8 | 2.95E-02 | C8orf32   | BC008781     | chromosome 8 open reading frame 32                                                         |
| 8 | 2.95E-02 | ATAD2     | CR749832     | ATPase family, AAA domain containing 2                                                     |
| 8 | 2.95E-02 | GPR20     | NM_005293    | G protein-coupled receptor 20                                                              |
| 8 | 2.95E-02 | NAPRT1    | AY214327     | nicotinate phosphoribosyltransferase domain containing 1                                   |
| 8 | 2.95E-02 | XPO7      | BC030785     | exportin 7                                                                                 |
| 8 | 2.95E-02 | BAG4      | NM_004874    | BCL2-associated athanogene 4                                                               |
| 8 | 3.40E-02 | KLF10     | NM_005655    | Kruppel-like factor 10                                                                     |
| 8 | 3.40E-02 | TMEM76    | BC012452     | transmembrane protein 76                                                                   |
| 8 | 3.58E-02 | SFTPC     | BC005913     | surfactant, pulmonary-associated protein C                                                 |
| 8 | 3.58E-02 | BMP1      | NM_001199    | bone morphogenetic protein 1                                                               |
| 8 | 3.86E-02 | COX6C     | NM_004374    | cytochrome c oxidase subunit VIc                                                           |
| 8 | 3.86E-02 | LRRC6     | NM_012472    | leucine rich repeat containing 6                                                           |
| 8 | 4.27E-02 | RAB11FIP1 | AY367050     | RAB11 family interacting protein 1 (class I)                                               |
| 8 | 4.40E-02 | CSMD3     | NM_052900    | CUB and Sushi multiple domains 3                                                           |
| 8 | 4.40E-02 | CCDC26    | NM_145050    | coiled-coil domain containing 26                                                           |
| 8 | 4.40E-02 | C8orf37   | NM_177965    | chromosome 8 open reading frame 37                                                         |
| 8 | 4.85E-02 | PPM2C     | NM_018444    | protein phosphatase 2C, magnesium-dependent, catalytic subunit                             |
| 8 | 4.85E-02 | PTDSS1    | NM_014754    | phosphatidylserine synthase 1                                                              |
| 8 | 4.85E-02 | MTERFD1   | NM_015942    | MTERF domain containing 1                                                                  |
| 8 | 4.94E-02 | LOC642872 | XM_931134    | hypothetical protein LOC642872                                                             |
| 9 | 1.00E-02 | UBADC1    | NM_016172    | ubiquitin associated domain containing 1                                                   |
| 9 | 1.03E-02 | IER5L     | AK123797     | immediate early response 5-like                                                            |
| 9 | 1.25E-02 | LOC647062 | XM_930064    | similar to chromosome 9 open reading frame 36                                              |
| 9 | 1.25E-02 | LOC647060 | XM_934260    | hypothetical protein LOC647060                                                             |
| 9 | 1.26E-02 | C9orf24   | NM_147169    | chromosome 9 open reading frame 24                                                         |
| 9 | 1.61E-02 | CCL21     | NM_002989    | chemokine (C-C motif) ligand 21                                                            |
| 9 | 1.61E-02 | CTSL2     | NM_001333    | cathepsin L2                                                                               |
| 9 | 1.63E-02 | UNQ2541   | BC035124     | MSFL2541                                                                                   |
| 9 | 1.63E-02 | FOXD4L4   | NM_199244    | forkhead box D4-like 4                                                                     |
| 9 | 1.64E-02 | LOC90120  | XM_931237    | hypothetical gene supported by AK023162                                                    |
| 9 | 1.64E-02 | PIGO      | BC013987     | phosphatidylinositol glycan, class O                                                       |
| 9 | 1.64E-02 | CBWD3     | BC069006     | COBW domain containing 3                                                                   |
| 9 | 1.64E-02 | LOC644019 | XM_933219    | COBW domain containing 3-like                                                              |
| 9 | 1.64E-02 | CBWD5     | NM_001024916 | COBW domain containing 5                                                                   |
| 9 | 1.94E-02 | PTPLAD2   | CR608542     | protein tyrosine phosphatase-like A domain containing 2                                    |
| 9 | 1.94E-02 | C9orf127  | BC041377     | chromosome 9 open reading frame 127                                                        |
| 9 | 2.26E-02 | LOC441417 | XM_497039    | hypothetical LOC441417                                                                     |
| 9 | 2.26E-02 | LOC653453 | XM_933338    | similar to Keratinocyte growth factor precursor (KGF) (Fibroblast growth factor 7) (FGF-7) |
| 9 | 2.41E-02 | NR6A1     | BC030600     | nuclear receptor subfamily 6, group A, member 1                                            |
| 9 | 2.41E-02 | OLFML2A   | AY358185     | olfactomedin-like 2A                                                                       |

|    |          |             |              |                                                                                            |
|----|----------|-------------|--------------|--------------------------------------------------------------------------------------------|
| 9  | 2.41E-02 | CCBL1       | NM_004059    | cysteine conjugate-beta lyase%3B cytoplasmic                                               |
| 9  | 2.41E-02 | ANKRD15     | BC037495     | ankyrin repeat domain 15                                                                   |
| 9  | 2.44E-02 | ARRDC1      | NM_152285    | arrestin domain containing 1                                                               |
| 9  | 2.89E-02 | DOLPP1      | NM_020438    | dolichyl pyrophosphate phosphatase 1                                                       |
| 9  | 2.89E-02 | SMC5L1      | BC038225     | SMC5 structural maintenance of chromosomes 5-like 1 (yeast)                                |
| 9  | 2.92E-02 | B4GALT1     | BC045773     | UDP-Gal:betaGlcNAc beta 1,4- galactosyltransferase, polypeptide 1                          |
| 9  | 2.92E-02 | CLTA        | BC009201     | clathrin, light polypeptide (Lca)                                                          |
| 9  | 2.92E-02 | LOC653123   | XM_926120    | similar to FLJ45202 protein                                                                |
| 9  | 2.92E-02 | FLJ45202    | AK127145     | FLJ45202 protein                                                                           |
| 9  | 2.95E-02 | EHMT1       | BC011608     | euomatic histone-lysine N-methyltransferase 1                                              |
| 9  | 2.95E-02 | RLN1        | NM_006911    | relaxin 1                                                                                  |
| 9  | 3.27E-02 | ST6GALNAC4  | NM_014403    | ST6 (alpha-N-acetyl-neuraminy-2,3-beta-galactosyl-1,3)-N-acetylgalactosaminide             |
| 9  | 3.27E-02 | VCP         | NM_007126    | valosin-containing protein                                                                 |
| 9  | 3.86E-02 | TRAF1       | NM_005658    | TNF receptor-associated factor 1                                                           |
| 9  | 3.86E-02 | OR1N1       | NM_012363    | olfactory receptor, family 1, subfamily N, member 1                                        |
| 9  | 3.86E-02 | LRRRC8A     | NM_019594    | leucine rich repeat containing 8 family, member A                                          |
| 9  | 3.86E-02 | NFX1        | BC012151     | nuclear transcription factor, X-box binding 1                                              |
| 9  | 4.27E-02 | RP11-95H8.1 | NM_001040065 | similar to chromosome 9 open reading frame 36                                              |
| 9  | 4.85E-02 | CCL19       | BC027968     | chemokine (C-C motif) ligand 19                                                            |
| 9  | 4.91E-02 | PGM5        | BC033073     | phosphoglucomutase 5                                                                       |
| 9  | 4.94E-02 | TSCOT       | BC048285     | thymic stromal co-transporter                                                              |
| 9  | 4.94E-02 | LOC389791   | NM_001013652 | hypothetical gene supported by AK094537                                                    |
| 9  | 4.94E-02 | PTGES2      | NM_198938    | prostaglandin E synthase 2                                                                 |
| 9  | 4.94E-02 | PPP2R4      | CR749810     | protein phosphatase 2A, regulatory subunit B' (PR 53)                                      |
| 9  | 4.94E-02 | CRAT        | NM_144782    | carnitine acetyltransferase                                                                |
| 9  | 4.94E-02 | QSCN6L1     | NM_181701    | quiescin Q6-like 1                                                                         |
| 9  | 4.94E-02 | EXOSC3      | NM_001002269 | exosome component 3                                                                        |
| 9  | 4.94E-02 | MCART1      | NM_033412    | mitochondrial carrier triple repeat 1                                                      |
| 9  | 4.94E-02 | LOC653449   | XM_933330    | similar to Keratinocyte growth factor precursor (KGF) (Fibroblast growth factor 7) (FGF-7) |
| 9  | 4.94E-02 | LOC653444   | XM_933308    | similar to hypothetical protein MGC21881                                                   |
| 10 | 1.00E-02 | ADARB2      | BC047443     | adenosine deaminase, RNA-specific, B2 (RED2 homolog rat)                                   |
| 10 | 1.32E-02 | C10orf54    | AY358379     | chromosome 10 open reading frame 54                                                        |
| 10 | 1.75E-02 | BLOC1S2     | BC020494     | biogenesis of lysosome-related organelles complex-1, subunit 2                             |
| 10 | 1.75E-02 | LOC642622   | XM_930958    | hypothetical protein LOC642622                                                             |
| 10 | 1.75E-02 | FLJ40536    | AK097855     | FLJ40536 protein                                                                           |
| 10 | 1.94E-02 | GSTO2       | NM_183239    | glutathione S-transferase omega 2                                                          |
| 10 | 2.83E-02 | TSPAN14     | BC093016     | tetraspanin 14                                                                             |
| 10 | 2.95E-02 | ZNF485      | AK074679     | zinc finger protein 485                                                                    |
| 11 | 1.05E-02 | LOC283130   | BC036869     | hypothetical protein LOC283130                                                             |
| 11 | 1.05E-02 | FKSG44      | AK074850     | FKSG44 gene                                                                                |
| 11 | 1.13E-02 | SCN2B       | BC036793     | sodium channel, voltage-gated, type II, beta                                               |
| 11 | 1.32E-02 | LRP5        | NM_002335    | low density lipoprotein receptor-related protein 5                                         |
| 11 | 1.42E-02 | C11orf10    | BC002750     | chromosome 11 open reading frame 10                                                        |
| 11 | 1.42E-02 | FEN1        | NM_004111    | flap structure-specific endonuclease 1                                                     |
| 11 | 1.42E-02 | RPS25       | BC004986     | ribosomal protein S25                                                                      |
| 11 | 1.42E-02 | TRAPPC4     | NM_016146    | trafficking protein particle complex 4                                                     |
| 11 | 1.75E-02 | RNF26       | BC007534     | ring finger protein 26                                                                     |
| 11 | 2.63E-02 | FLJ30934    | NM_152760    | hypothetical protein FLJ30934                                                              |
| 11 | 2.63E-02 | PACS1       | NM_018026    | phosphofurin acidic cluster sorting protein 1                                              |
| 11 | 2.63E-02 | PRCP        | NM_005040    | prolylcarboxypeptidase (angiotensinase C)                                                  |
| 11 | 2.63E-02 | FLJ25416    | AK058145     | hypothetical protein FLJ25416                                                              |
| 11 | 2.83E-02 | NXF1        | NM_006362    | nuclear RNA export factor 1                                                                |

|    |          |           |           |                                                                                    |
|----|----------|-----------|-----------|------------------------------------------------------------------------------------|
| 11 | 3.07E-02 | FAM89B    | BC023991  | family with sequence similarity 89, member B                                       |
| 11 | 3.07E-02 | SSSCA1    | BC014791  | Sjogren's syndrome/scleroderma autoantigen 1                                       |
| 11 | 3.27E-02 | ACP2      | BC003160  | acid phosphatase 2, lysosomal                                                      |
| 11 | 3.27E-02 | NR1H3     | BC041172  | nuclear receptor subfamily 1, group H, member 3                                    |
| 11 | 3.27E-02 | SUV420H1  | NM_017635 | suppressor of variegation 4-20 homolog 1 (Drosophila)                              |
| 11 | 3.27E-02 | DGAT2     | BC015234  | diacylglycerol O-acyltransferase homolog 2 (mouse)                                 |
| 11 | 3.56E-02 | LRRC56    | NM_198075 | leucine rich repeat containing 56                                                  |
| 11 | 3.56E-02 | HRAS      | NM_005343 | v-Ha-ras Harvey rat sarcoma viral oncogene homolog                                 |
| 11 | 3.56E-02 | MARK2     | NM_004954 | MAP/microtubule affinity-regulating kinase 2                                       |
| 11 | 3.56E-02 | OAF       | BC047726  | OAF homolog (Drosophila)                                                           |
| 11 | 3.56E-02 | RPUSD4    | NM_032795 | RNA pseudouridylate synthase domain containing 4                                   |
| 11 | 3.56E-02 | FLJ21103  | CR625659  | hypothetical protein FLJ21103                                                      |
| 11 | 4.09E-02 | PRDM10    | NM_199439 | PR domain containing 10                                                            |
| 11 | 4.59E-02 | LIN7C     | BC053907  | lin-7 homolog C (C. elegans)                                                       |
| 12 | 1.42E-02 | SLC38A1   | BC010620  | solute carrier family 38, member 1                                                 |
| 12 | 1.94E-02 | ESPL1     | NM_012291 | extra spindle poles like 1 (S. cerevisiae)                                         |
| 12 | 2.53E-02 | GPR84     | NM_020370 | G protein-coupled receptor 84                                                      |
| 12 | 2.53E-02 | MGC7036   | BC013042  | hypothetical protein MGC7036                                                       |
| 12 | 2.63E-02 | GALNT6    | BC035822  | UDP-N-acetyl-alpha-D-galactosamine:polypeptide N-acetylgalactosaminyltransferase 6 |
| 12 | 2.63E-02 | SLC4A8    | AK128321  | solute carrier family 4, sodium bicarbonate cotransporter, member 8                |
| 12 | 3.09E-02 | ZNF385    | NM_015481 | zinc finger protein 385                                                            |
| 12 | 3.27E-02 | LETMD1    | BC064943  | LETM1 domain containing 1                                                          |
| 12 | 3.56E-02 | PFDN5     | NM_145896 | prefoldin subunit 5                                                                |
| 12 | 3.56E-02 | MYL6B     | NM_002475 | myosin, light polypeptide 6B, alkali, smooth muscle and non-muscle                 |
| 12 | 3.56E-02 | MYL6      | NM_021019 | myosin, light polypeptide 6, alkali, smooth muscle and non-muscle                  |
| 12 | 3.56E-02 | FLJ21127  | AK092775  | tectonic                                                                           |
| 12 | 4.12E-02 | PLEKHG6   | NM_018173 | pleckstrin homology domain containing, family G (with RhoGef domain) member 6      |
| 12 | 4.59E-02 | NCOR2     | NM_006312 | nuclear receptor co-repressor 2                                                    |
| 13 | 2.83E-02 | HSPH1     | AB003333  | heat shock 105kDa/110kDa protein 1                                                 |
| 13 | 3.56E-02 | LOC643011 | XM_931238 | hypothetical protein LOC643011                                                     |
| 13 | 3.56E-02 | DNAJC3    | BC047936  | DnaJ (Hsp40) homolog, subfamily C, member 3                                        |
| 14 | 1.05E-02 | TNFAIP2   | NM_006291 | tumor necrosis factor, alpha-induced protein 2                                     |
| 14 | 1.32E-02 | SUPT16H   | NM_007192 | suppressor of Ty 16 homolog (S. cerevisiae)                                        |
| 14 | 1.32E-02 | SNAPC1    | BC019038  | small nuclear RNA activating complex, polypeptide 1, 43kDa                         |
| 14 | 1.62E-02 | ZFHX2     | NM_033400 | zinc finger homeobox 2                                                             |
| 14 | 1.67E-02 | CDCA4     | NM_017955 | cell division cycle associated 4                                                   |
| 14 | 1.75E-02 | RIN3      | AK026092  | Ras and Rab interactor 3                                                           |
| 14 | 2.63E-02 | DHRS4L2   | NM_198083 | dehydrogenase/reductase (SDR family) member 4 like 2                               |
| 14 | 3.27E-02 | ZFYVE21   | CR622229  | zinc finger, FYVE domain containing 21                                             |
| 14 | 3.51E-02 | C14orf78  | BC090889  | chromosome 14 open reading frame 78                                                |
| 14 | 3.73E-02 | PSME2     | BC072025  | proteasome (prosome, macropain) activator subunit 2 (PA28 beta)                    |
| 14 | 3.73E-02 | RNF31     | AY256461  | ring finger protein 31                                                             |
| 14 | 3.73E-02 | C14orf122 | NM_016049 | chromosome 14 open reading frame 122                                               |
| 14 | 4.12E-02 | ADCY4     | AK131333  | adenylate cyclase 4                                                                |
| 15 | 1.42E-02 | RPS17     | BC062715  | ribosomal protein S17                                                              |
| 15 | 1.75E-02 | PCSK6     | NM_138321 | proprotein convertase subtilisin/kexin type 6                                      |
| 15 | 1.94E-02 | LOC653359 | XM_933220 | similar to cis-Golgi matrix protein GM130                                          |
| 15 | 1.94E-02 | RCCD1     | NM_033544 | RCC1 domain containing 1                                                           |
| 15 | 3.51E-02 | ZFYVE19   | BC015738  | zinc finger, FYVE domain containing 19                                             |
| 15 | 3.51E-02 | DNAJC17   | NM_018163 | DnaJ (Hsp40) homolog, subfamily C, member 17                                       |
| 15 | 3.73E-02 | GABARAPL3 | AF180519  | GABA(A) receptors associated protein like 3                                        |
| 15 | 3.73E-02 | MGC75360  | BC067279  | similar to zinc finger protein 29                                                  |

|    |          |              |              |                                                                                        |
|----|----------|--------------|--------------|----------------------------------------------------------------------------------------|
| 16 | 1.32E-02 | TBL3         | NM_006453    | transducin (beta)-like 3                                                               |
| 16 | 1.32E-02 | LOC644349    | XM_932139    | hypothetical protein LOC644349                                                         |
| 16 | 1.32E-02 | CPNE2        | NM_152727    | copine II                                                                              |
| 16 | 1.32E-02 | KIAA0182     | BC037556     | KIAA0182                                                                               |
| 16 | 1.32E-02 | GIYD2        | BC015990     | GIY-YIG domain containing 2                                                            |
| 16 | 1.32E-02 | GIYD1        | NM_001014999 | GIY-YIG domain containing 1                                                            |
| 16 | 1.32E-02 | LOC440354    | AF271775     | PI-3-kinase-related kinase SMG-1 pseudogene                                            |
| 16 | 1.32E-02 | SULT1A4      | NM_001017391 | sulfotransferase family, cytosolic, 1A, phenol-preferring, member 4                    |
| 16 | 1.32E-02 | SULT1A3      | BC111011     | sulfotransferase family, cytosolic, 1A, phenol-preferring, member 3                    |
| 16 | 2.63E-02 | METRNL       | BC000662     | meteorin, glial cell differentiation regulator                                         |
| 16 | 2.63E-02 | LOC440356    | XM_934751    | hypothetical gene supported by AK131031%3B BC070380                                    |
| 16 | 2.63E-02 | CDIPT        | AK131349     | CDP-diacylglycerol--inositol 3-phosphatidyltransferase (phosphatidylinositol synthase) |
| 16 | 2.63E-02 | ABCC11       | BC039085     | ATP-binding cassette, sub-family C (CFTR/MRP), member 11                               |
| 16 | 2.63E-02 | LONPL        | BC093910     | peroxisomal LON protease like                                                          |
| 16 | 2.63E-02 | DDX28        | BC024273     | DEAD (Asp-Glu-Ala-Asp) box polypeptide 28                                              |
| 16 | 2.63E-02 | DUS2L        | BC006527     | dihydrouridine synthase 2-like, SMM1 homolog ( <i>S. cerevisiae</i> )                  |
| 16 | 2.72E-02 | PSMB10       | NM_002801    | proteasome (prosome, macropain) subunit, beta type, 10                                 |
| 16 | 2.96E-02 | MGC24381     | BC011785     | hypothetical protein MGC24381                                                          |
| 16 | 2.96E-02 | GNPTG        | NM_032520    | N-acetylglucosamine-1-phosphate transferase, gamma subunit                             |
| 16 | 3.09E-02 | P8           | NM_012385    | p8 protein (candidate of metastasis 1)                                                 |
| 16 | 3.09E-02 | DKFZp547E087 | BC094882     | hypothetical gene LOC238346                                                            |
| 16 | 3.51E-02 | HSPC171      | BC013412     | HSPC171 protein                                                                        |
| 16 | 3.51E-02 | LRRC29       | NM_001004055 | leucine rich repeat containing 29                                                      |
| 16 | 3.51E-02 | LOC653563    | XM_928111    | similar to leucine rich repeat containing 29                                           |
| 16 | 3.73E-02 | SULT1A1      | NM_001055    | sulfotransferase family, cytosolic, 1A, phenol-preferring, member 1                    |
| 16 | 4.12E-02 | FAM96B       | BC001733     | family with sequence similarity 96, member B                                           |
| 16 | 4.12E-02 | CES2         | NM_003869    | carboxylesterase 2 (intestine, liver)                                                  |
| 16 | 4.59E-02 | LAT          | BC011563     | linker for activation of T cells                                                       |
| 17 | 1.42E-02 | NBR2         | BC000924     | neighbor of BRCA1 gene 2                                                               |
| 17 | 1.42E-02 | CCDC57       | NM_152675    | coiled-coil domain containing 57                                                       |
| 17 | 1.62E-02 | CCL4         | BC104226     | chemokine (C-C motif) ligand 4                                                         |
| 17 | 1.75E-02 | LOC645427    | XM_928468    | hypothetical protein LOC645427                                                         |
| 17 | 1.75E-02 | KCNJ12       | NM_021012    | potassium inwardly-rectifying channel, subfamily J, member 12                          |
| 17 | 1.94E-02 | CD68         | BX647524     | CD68 molecule                                                                          |
| 17 | 1.94E-02 | MPDU1        | BC001898     | mannose-P-dolichol utilization defect 1                                                |
| 17 | 1.94E-02 | HES7         | NM_032580    | hairy and enhancer of split 7 ( <i>Drosophila</i> )                                    |
| 17 | 1.94E-02 | LOC440422    | XM_498661    | hypothetical LOC440422                                                                 |
| 17 | 1.94E-02 | CCDC16       | BC011584     | coiled-coil domain containing 16                                                       |
| 17 | 1.94E-02 | CCT6B        | NM_006584    | chaperonin containing TCP1, subunit 6B (zeta 2)                                        |
| 17 | 1.94E-02 | ANAPC11      | NM_001002245 | APC11 anaphase promoting complex subunit 11 homolog (yeast)                            |
| 17 | 2.63E-02 | LOC653047    | XM_930719    | similar to TBC1 domain family member 3 (Rab GTPase-activating protein PRC17)           |
| 17 | 2.63E-02 | LOC162427    | NM_178126    | hypothetical protein LOC162427                                                         |
| 17 | 2.63E-02 | TUBG1        | NM_001070    | tubulin, gamma 1                                                                       |
| 17 | 2.72E-02 | CSH1         | BC020756     | chorionic somatomammotropin hormone 1 (placental lactogen)                             |
| 17 | 2.72E-02 | CSH2         | CR620501     | chorionic somatomammotropin hormone 2                                                  |
| 17 | 2.72E-02 | AMZ2         | BC035935     | archaemetzincins-2                                                                     |
| 17 | 3.27E-02 | PER1         | BC028207     | period homolog 1 ( <i>Drosophila</i> )                                                 |
| 17 | 3.56E-02 | INCA1        | NM_213726    | inhibitor of CDK interacting with cyclin A1                                            |
| 17 | 3.56E-02 | GCN5L2       | NM_021078    | GCN5 general control of amino-acid synthesis 5-like 2 (yeast)                          |
| 17 | 3.56E-02 | HSPB9        | BC093991     | heat shock protein, alpha-crystallin-related, B9                                       |
| 17 | 3.56E-02 | SNX11        | NM_152244    | sorting nexin 11                                                                       |
| 17 | 3.56E-02 | PSMC5        | NM_002805    | proteasome (prosome, macropain) 26S subunit, ATPase, 5                                 |



|    |          |           |              |                                                                                                      |
|----|----------|-----------|--------------|------------------------------------------------------------------------------------------------------|
| 17 | 3.56E-02 | CSNK1D    | NM_001893    | casein kinase 1, delta                                                                               |
| 17 | 4.09E-02 | STAT5B    | BC065227     | signal transducer and activator of transcription 5B                                                  |
| 17 | 4.12E-02 | LOC653676 | XM_933229    | similar to hypothetical protein FLJ10700                                                             |
| 17 | 4.12E-02 | C17orf63  | NM_018182    | chromosome 17 open reading frame 63                                                                  |
| 17 | 4.59E-02 | PNPO      | NM_018129    | pyridoxine 5'-phosphate oxidase                                                                      |
| 18 | 2.83E-02 | MBP       | BC080654     | myelin basic protein                                                                                 |
| 18 | 3.56E-02 | GATA6     | X95701       | GATA binding protein 6                                                                               |
| 18 | 3.56E-02 | CCDC5     | BC005958     | coiled-coil domain containing 5 (spindle associated)                                                 |
| 18 | 3.56E-02 | ATP5A1    | NM_001001937 | ATP synthase, H <sup>+</sup> transporting, mitochondrial F1 complex, alpha subunit 1, cardiac muscle |
| 18 | 4.12E-02 | THOC1     | BC010381     | THO complex 1                                                                                        |
| 19 | 1.32E-02 | KLK14     | NM_022046    | kallikrein 14                                                                                        |
| 19 | 1.32E-02 | CCDC97    | BC011577     | coiled-coil domain containing 97                                                                     |
| 19 | 1.42E-02 | PTGER1    | BC051286     | prostaglandin E receptor 1 (subtype EP1), 42kDa                                                      |
| 19 | 1.42E-02 | ZNF574    | AK131369     | zinc finger protein 574                                                                              |
| 19 | 1.42E-02 | GRIK5     | NM_002088    | glutamate receptor, ionotropic, kainate 5                                                            |
| 19 | 1.62E-02 | ZNF528    | NM_032423    | zinc finger protein 528                                                                              |
| 19 | 1.75E-02 | TNNT1     | NM_003283    | troponin T type 1 (skeletal, slow)                                                                   |
| 19 | 1.94E-02 | RPS9      | BC000802     | ribosomal protein S9                                                                                 |
| 19 | 2.63E-02 | ATP8B3    | AK125969     | ATPase, Class I, type 8B, member 3                                                                   |
| 19 | 2.63E-02 | TIMM50    | BC105970     | translocase of inner mitochondrial membrane 50 homolog (S. cerevisiae)                               |
| 19 | 2.63E-02 | RASIP1    | NM_017805    | Ras interacting protein 1                                                                            |
| 19 | 2.63E-02 | KCNA7     | NM_031886    | potassium voltage-gated channel, shaker-related subfamily, member 7                                  |
| 19 | 2.63E-02 | FAM108A1  | BC011667     | family with sequence similarity 108, member A1                                                       |
| 19 | 2.72E-02 | PRKACA    | BC039846     | protein kinase, cAMP-dependent, catalytic, alpha                                                     |
| 19 | 2.72E-02 | PSENNEN   | AF162447     | presenilin enhancer 2 homolog (C. elegans)                                                           |
| 19 | 2.83E-02 | RPS11     | BC070224     | ribosomal protein S11                                                                                |
| 19 | 2.96E-02 | LILRB2    | BC025766     | leukocyte immunoglobulin-like receptor, subfamily B (with TM and ITIM domains), member 2             |
| 19 | 3.07E-02 | LOC653037 | XM_925777    | similar to CXYorf1-related protein                                                                   |
| 19 | 3.09E-02 | IL11      | BC012506     | interleukin 11                                                                                       |
| 19 | 3.27E-02 | HRC       | NM_002152    | histidine rich calcium binding protein                                                               |
| 19 | 3.27E-02 | TRPM4     | NM_017636    | transient receptor potential cation channel, subfamily M, member 4                                   |
| 19 | 3.51E-02 | CIC       | NM_015125    | capicua homolog (Drosophila)                                                                         |
| 19 | 3.56E-02 | LOC126520 | XM_932164    | hypothetical protein LOC126520                                                                       |
| 19 | 3.56E-02 | DBP       | BC011965     | D site of albumin promoter (albumin D-box) binding protein                                           |
| 19 | 3.56E-02 | CHMP2A    | NM_014453    | omatin modifying protein 2A                                                                          |
| 19 | 4.09E-02 | ARHGEF18  | BC077721     | rho/rac guanine nucleotide exchange factor (GEF) 18                                                  |
| 19 | 4.09E-02 | CNTD2     | NM_024877    | cyclin N-terminal domain containing 2                                                                |
| 19 | 4.09E-02 | RUVBL2    | NM_006666    | RuvB-like 2 (E. coli)                                                                                |
| 19 | 4.12E-02 | MORG1     | BC005870     | mitogen-activated protein kinase organizer 1                                                         |
| 19 | 4.12E-02 | PTD008    | NM_016145    | PTD008 protein                                                                                       |
| 19 | 4.12E-02 | MAN2B1    | NM_000528    | mannosidase, alpha, class 2B, member 1                                                               |
| 19 | 4.59E-02 | TNPO2     | AK022217     | transportin 2 (importin 3, karyopherin beta 2b)                                                      |
| 19 | 4.59E-02 | CD37      | NM_001040031 | CD37 molecule                                                                                        |
| 20 | 1.75E-02 | HSUP1     | XM_929750    | similar to RPE-spondin                                                                               |
| 20 | 1.75E-02 | ZNFX1     | NM_021035    | zinc finger, NFX1-type containing 1                                                                  |
| 20 | 1.94E-02 | BMP7      | BC004248     | bone morphogenetic protein 7 (osteogenic protein 1)                                                  |
| 20 | 2.26E-02 | ZGPAT     | NM_181485    | zinc finger, CCCH-type with G patch domain                                                           |
| 20 | 2.63E-02 | SNRPB2    | BC036737     | small nuclear ribonucleoprotein polypeptide B''                                                      |
| 20 | 2.96E-02 | WFDC2     | NM_080736    | WAP four-disulfide core domain 2                                                                     |
| 20 | 4.09E-02 | DLGAP4    | BC108706     | discs, large (Drosophila) homolog-associated protein 4                                               |
| 20 | 4.12E-02 | FLJ30313  | BC093856     | hypothetical protein FLJ30313                                                                        |
| 20 | 4.12E-02 | C20orf166 | NM_178463    | chromosome 20 open reading frame 166                                                                 |

|    |          |              |                |                                                                     |
|----|----------|--------------|----------------|---------------------------------------------------------------------|
| 21 | 1.32E-02 | ATP5J        | BC066310       | ATP synthase, H+ transporting, mitochondrial F0 complex, subunit F6 |
| 21 | 1.32E-02 | GABPA        | BC035031       | GA binding protein transcription factor, alpha subunit 60kDa        |
| 21 | 1.94E-02 | C21orf124    | NM_032920      | chromosome 21 open reading frame 124                                |
| 21 | 3.27E-02 | ADAMTS1      | AK129873       | ADAM metalloproteinase with thrombospondin type 1 motif, 1          |
| 21 | 3.56E-02 | BAGE         | NM_001187      | B melanoma antigen                                                  |
| 21 | 3.56E-02 | BAGE4        | NM_181704      | B melanoma antigen family, member 4                                 |
| 21 | 3.56E-02 | BAGE3        | NM_182481      | B melanoma antigen family, member 3                                 |
| 21 | 3.56E-02 | BAGE5        | NM_182484      | B melanoma antigen family, member 5                                 |
| 21 | 4.12E-02 | UMODL1       | NM_001004416   | uromodulin-like 1                                                   |
| 22 | 1.42E-02 | HIC2         | BC094787       | hypermethylated in cancer 2                                         |
| 22 | 1.67E-02 | PLXNB2       | AB002313       | plexin B2                                                           |
| 22 | 2.26E-02 |              | 3-Sep AL833942 | septin 3                                                            |
| 22 | 3.27E-02 | DKFZp434N035 | NM_032262      | hypothetical protein DKFZp434N035                                   |
| 22 | 3.27E-02 | LOC653603    | XM_928356      | similar to hypothetical protein DKFZp434N035                        |
| 22 | 3.27E-02 | NEFH         | AB020652       | neurofilament, heavy polypeptide 200kDa                             |
| 22 | 3.56E-02 | IGLV3-21     | BC070352       | immunoglobulin lambda variable 3-21                                 |
| 22 | 3.56E-02 | IGLC1        | BC070353       | immunoglobulin lambda constant 1 (Meg marker)                       |
| 22 | 3.56E-02 | IGLJ3        | X57812         | immunoglobulin lambda joining 3                                     |
| 22 | 4.12E-02 | PSCD4        | AK002145       | pleckstrin homology, Sec7 and coiled-coil domains 4                 |
| 22 | 4.12E-02 | TNFRSF13C    | BC112030       | tumor necrosis factor receptor superfamily, member 13C              |
| X  | 1.75E-02 | HDAC6        | BC013737       | histone deacetylase 6                                               |
| X  | 1.75E-02 | NAPIL3       | BC034954       | nucleosome assembly protein 1-like 3                                |
| X  | 1.75E-02 | RP1-32F7.2   | NM_173698      | hypothetical protein FLJ37659                                       |
| X  | 2.63E-02 | FLJ44451     | XM_931499      | FLJ44451 fis                                                        |
| X  | 2.63E-02 | CXorf40B     | BC009523       | chromosome X open reading frame 40B                                 |
| X  | 3.27E-02 | BTK          | BC109079       | Bruton agammaglobulinemia tyrosine kinase                           |
| X  | 3.27E-02 | RPL36A       | NM_021029      | ribosomal protein L36a                                              |
| X  | 4.12E-02 | MLLT7        | NM_005938      | myeloid/lymphoid or mixed-lineage leukemia                          |
| X  | 4.59E-02 | PPP1R3F      | NM_033215      | protein phosphatase 1, regulatory (inhibitor) subunit 3F            |
| X  | 4.59E-02 | FOXP3        | NM_014009      | forkhead box P3                                                     |
| Y  | 1.05E-02 | LOC642391    | XM_497196      | similar to chromosome Y open reading frame 16                       |
| Y  | 2.19E-02 | LOC642431    | XM_497198      | similar to chromosome Y open reading frame 16                       |
| Y  | 2.19E-02 | LOC653293    | XM_926983      | similar to testis specific protein, Y-linked 1                      |
| Y  | 2.63E-02 | LOC642586    | XM_926070      | similar to chromosome Y open reading frame 16                       |
| Y  | 2.63E-02 | LOC653178    | XM_926636      | similar to testis specific protein, Y-linked 1                      |
| Y  | 3.07E-02 | LOC642358    | XM_497193      | similar to chromosome Y open reading frame 16                       |
| Y  | 3.07E-02 | LOC653280    | XM_926947      | similar to testis specific protein, Y-linked 1                      |
| Y  | 3.27E-02 | LOC653272    | XM_926926      | similar to testis specific protein, Y-linked 1                      |
